## 8 **Abstract**

9 Flowering plants utilize small RNA molecules to guide DNA methyltransferases to genomic  
10 sequences. This RNA-directed DNA methylation (RdDM) pathway preferentially targets  
11 euchromatic transposable elements. However, RdDM is thought to be recruited by methylation  
12 of histone H3 at lysine 9 (H3K9me), a hallmark of heterochromatin. How RdDM is targeted to  
13 euchromatin despite an affinity for H3K9me is unclear. Here we show that loss of histone H1  
14 enhances heterochromatic RdDM, preferentially at nucleosome linker DNA. Surprisingly, this  
15 does not require SHH1, the RdDM component that binds H3K9me. Furthermore, H3K9me is  
16 dispensable for RdDM, as is CG DNA methylation. Instead, we find that non-CG methylation  
17 is specifically required for small RNA biogenesis, and without H1 small RNA production  
18 quantitatively expands to non-CG methylated loci. Our results demonstrate that H1 enforces  
19 the separation of euchromatic and heterochromatic DNA methylation pathways by excluding  
20 the small RNA-generating branch of RdDM from non-CG methylated heterochromatin.

## 21 **Introduction**

22 Transposable elements (TEs) and their remnants comprise a substantial fraction of  
23 eukaryotic genomes and generally must be kept silent to ensure genome integrity and function  
24 (Bourque et al., 2018). TE silencing is achieved despite the disruption caused by each cell  
25 division, whereby half of the genome and histone proteins are made anew. Robust cellular  
26 memory of the inactive state is achieved by feedback interactions that reinforce and concentrate  
27 chromatin features and factors that contribute to transcriptional silencing and exclude  
28 activating factors (Allshire and Madhani, 2018; H. Zhang et al., 2018). However, silent  
29 chromatin domains are not homogenous. Flowering plants have two major types of TE-  
30 associated silent chromatin: GC-rich coding regions of autonomous TEs, and AT-rich  
31 chromatin comprised of gene-proximal TE remnants, short non-autonomous TEs and edges of  
32 autonomous TEs (Sequeira-Mendes et al., 2014; To et al., 2020; Zemach et al., 2013; Zhong et  
33 al., 2012). Although both are comprised of TEs, these chromatin types have distinct features  
34 (Sequeira-Mendes et al., 2014; Zemach et al., 2013). How two types of silent TE chromatin  
35 are distinguished and kept separate within the nucleus is a major open question.

36 Both types of TE chromatin feature extensive cytosine methylation in the CG context  
37 catalyzed by MET1 (plant homolog of Dnmt1) (Cokus et al., 2008; Lister et al., 2008; Zemach  
38 et al., 2013), and are also methylated at non-CG (CHG and CHH, where H is A, T or C)  
39 cytosines (Stroud et al., 2014; Zemach et al., 2013). GC-rich TE sequences have high levels of  
40 histone modifications associated with heterochromatin, including methylation of lysine nine of  
41 histone H3 (H3K9me), and are therefore known as heterochromatic TEs (Sequeira-Mendes et  
42 al., 2014; Zemach et al., 2013). Non-CG methylation at heterochromatic TEs is catalyzed  
43 primarily by chromomethylases (CMTs; CMT3 for CHG methylation and CMT2 for CHH),  
44 which are recruited to H3K9 dimethylated (H3K9me<sub>2</sub>) nucleosomes by histone-tail-interacting  
45 domains (Du et al., 2012; Stoddard et al., 2019; Stroud et al., 2014; Zemach et al., 2013). SUVH

46 family H3K9me methyltransferases are in turn recruited to methylated DNA via SRA domains,  
47 forming a self-reinforcing loop (Du et al., 2014; Johnson et al., 2007; Rajakumara et al., 2011).  
48 *Arabidopsis thaliana* plants lacking functional chromomethylases (*cmt2cmt3* mutants) almost  
49 completely lack non-CG methylation at heterochromatic TEs, and their H3K9 methylation is  
50 greatly reduced (Stroud et al., 2014).

51 AT-rich TE sequences are low in H3K9me and other heterochromatic histone  
52 modifications, and are therefore known as euchromatic TEs (Sequeira-Mendes et al., 2014;  
53 Zemach et al., 2013). In contrast to the SUVH/CMT feedback loop that predominates in  
54 heterochromatin, RNA-directed DNA methylation (RdDM) catalyzes cytosine methylation  
55 within euchromatic TEs (Zemach et al., 2013; Zhong et al., 2012). RdDM loci are transcribed  
56 by a methylation-tolerant RNA polymerase II derivative (Pol IV) that couples co-  
57 transcriptionally with RNA-dependent RNA polymerase 2 (RDR2) to make double stranded  
58 RNA, which is processed into 23/24-nt fragments by Dicer-like 3 (DCL3). These 24-nt small  
59 RNAs (sRNA) are subsequently denatured and loaded into Argonaute (AGO) protein  
60 complexes. AGO-sRNA complexes associate with another Pol II family enzyme, Pol V, to  
61 recruit DRM DNA methyltransferases (primarily DRM2 in *Arabidopsis*) (Erdmann and Picard,  
62 2020; Matzke and Mosher, 2014; Raju et al., 2019; Wendte and Pikaard, 2017).

63 Like the SUVH/CMT pathway, RdDM comprises positive feedback loops. Pol V is  
64 recruited to methylated DNA, effectively seeking its own product (Liu et al., 2014; Wongpalee  
65 et al., 2019; Zhong et al., 2012). A more paradoxical feedback loop is thought to involve  
66 recruitment of Pol IV to H3K9me (Erdmann and Picard, 2020; Matzke and Mosher, 2014; Raju  
67 et al., 2019; Wendte and Pikaard, 2017).

68 This hypothesis emerged from the observation that Pol IV-mediated sRNA production  
69 at many loci requires SHH1/DTF1, a protein that binds H3K9me<sub>2</sub> and monomethylated  
70 H3K9me (H3K9me<sub>1</sub>) *in vitro* (Law et al., 2013; Zhang et al., 2013). This model of Pol IV



71 recruitment necessitates explaining how RdDM in general, and Pol IV specifically, is excluded  
72 from heterochromatic TEs with high H3K9me and targeted to euchromatic TEs with low  
73 H3K9me. Reliance of Pol IV on H3K9me also poses two theoretical questions. First, why  
74 would RdDM depend on a core component of the SUVH/CMT feedback loop (H3K9me<sub>2</sub>),  
75 when the two DNA methylation systems have effectively non-overlapping primary targets  
76 (Stroud et al., 2014), and RdDM targets are H3K9me-depleted? Second, the euchromatic TEs  
77 targeted by RdDM are often comprised of just one or two nucleosomes (Zemach et al., 2013).  
78 Maintenance of histone modifications is expected to be unstable at such short sequences due  
79 to the random partitioning of nucleosomes to sister chromatids following DNA replication  
80 (Angel et al., 2011; Berry and Dean, 2015; Lövkvist and Howard, 2021; Ramachandran and  
81 Henikoff, 2015; Zilberman and Henikoff, 2004). Why would RdDM, a pathway capable of  
82 almost nucleotide-level resolution (Blevins et al., 2015; Zhai et al., 2015) and specialized for  
83 silencing short TEs, be tied to a histone modification that requires longer sequences for stable  
84 propagation?

85         Here, we show that Pol IV activity is recruited to sequences with non-CG DNA  
86 methylation regardless of H3K9me, so that both the Pol IV and Pol V branches form positive  
87 feedback loops with the ultimate product of RdDM. We also show that linker histone H1  
88 impedes RdDM activity in GC-rich heterochromatin, thereby restricting RdDM to AT-rich  
89 euchromatic TE. We propose that without H1, RdDM would be diluted into and effectively  
90 incapacitated by the vast stretches of non-CG methylated heterochromatin common in plant  
91 genomes (Feng et al., 2010; Niederhuth et al., 2016; Ritter and Niederhuth, 2021; Zemach et  
92 al., 2010). The affinity of H1 for GC-rich heterochromatin (Choi et al., 2020) focuses RdDM  
93 activity on short, AT-rich euchromatic TEs that RdDM is uniquely suited to silence.

## 94 **Results**

### 95 **Histone H1 levels predict the global bifurcation of non-CG DNA methylating systems**

96 To understand how the CMT and RdDM pathways are separated, we categorized *Arabidopsis*  
97 TEs by the dependence of their CHH methylation (mCHH) either on CMT2 (CMT TEs) or  
98 DRM2 (DRM TEs). Among 18785 TEs with more than 2% mCHH in wild type (*wt*) plants,  
99 4486 TEs were demethylated in *cmt2* plants and 3039 TEs lost mCHH in *drm2* (mCHH in the  
100 mutants  $<0.02$ , Fisher's exact test  $p <0.01$ , TEs longer than 200 bp; Figure S1A and Table S1).  
101 Only 80 TEs lost mCHH methylation in both mutants (Table S1), consistent with the largely  
102 separate sets of DRM and CMT targets (Sigman and Slotkin, 2016; Stroud et al., 2014). Next,  
103 we used random forest classification (Breiman, 2001; Ishwaran et al., 2010) to identify  
104 predictors of DRM or CMT targets (Figure 1A). We included genetic and epigenetic features  
105 known to be associated with RdDM or CMT activity, as well as linker histone H1. H1 is  
106 specifically enriched in heterochromatic TEs, and its loss leads to increased DNA methylation  
107 at heterochromatic TEs and decreased methylation at euchromatic ones (Bourguet et al., 2021;  
108 Lyons and Zilberman, 2017; Papareddy et al., 2020; Rutowicz et al., 2015; Zemach et al., 2013).  
109 As expected, sRNA abundance can distinguish CMT and DRM TEs (Figure 1A). H3K9me1 is  
110 also a good classifier (Figure 1A). However, the best classifier turned out to be H1 (Figure 1A).  
111 Using all variables in Figure 1A, we could predict CMT and DRM TEs with an error rate of  
112 2.15% (Figure 1B). With just H3K9me1 and H1, the prediction is almost as accurate (5.42%  
113 error; Figure 1B). Remarkably, H1 alone successfully identifies CMT and DRM TEs (12.17%  
114 error; Figure 1B), suggesting that H1 is fundamental to separating these silencing pathways.

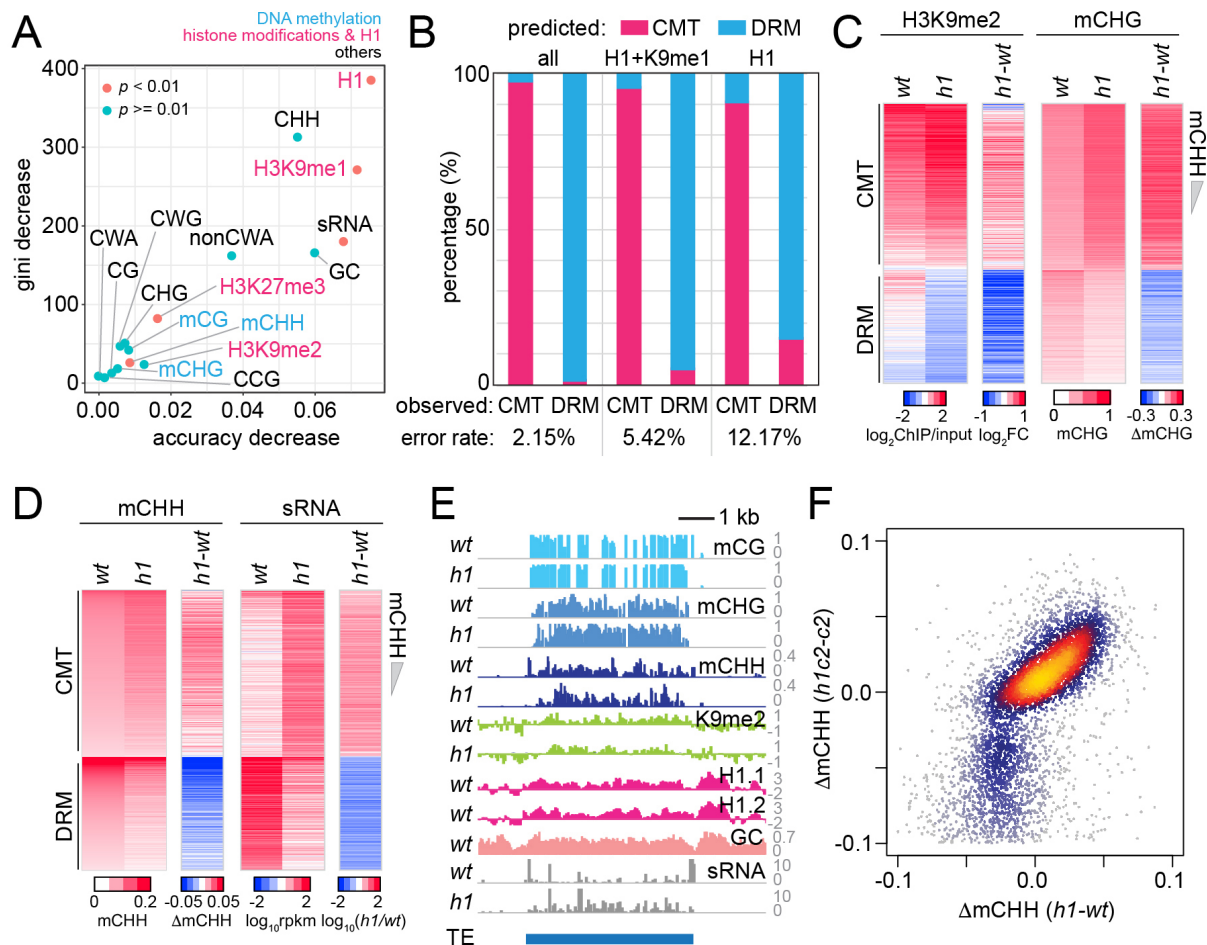

115 **Figure 1** Histone H1 prohibits RNA-directed DNA methylation of CMT-dependent  
 116 heterochromatic transposons.  
 117 **(A)** The importance of DNA methylation, histone H3 modifications, sRNA, H1, and cytosine  
 118 sequence context to predict CMT TE or DRM TE classes by random forest classification. **(B)**  
 119 Prediction of CMT or DRM TE classes by random forest classification with all variables, H1  
 120 and H3K9me1, or only H1. **(C and D)** Heatmaps of H3K9me2 and mCHG levels **(C)** and  
 121 mCHH and sRNA levels **(D)** at CMT and DRM TEs in *wt* and *h1* plants. TEs were sorted by  
 122 mCHH level in *wt*. **(E)** Example of DNA methylation and sRNA expression at a CMT TE in  
 123 *wt* and *h1* (AT1TE58075). **(F)** mCHH difference between *wt* and *h1* (x-axis) versus *h1cmt2*  
 124 (*h1c2*) and *cmt2* (*c2*; y-axis) at CMT TEs.

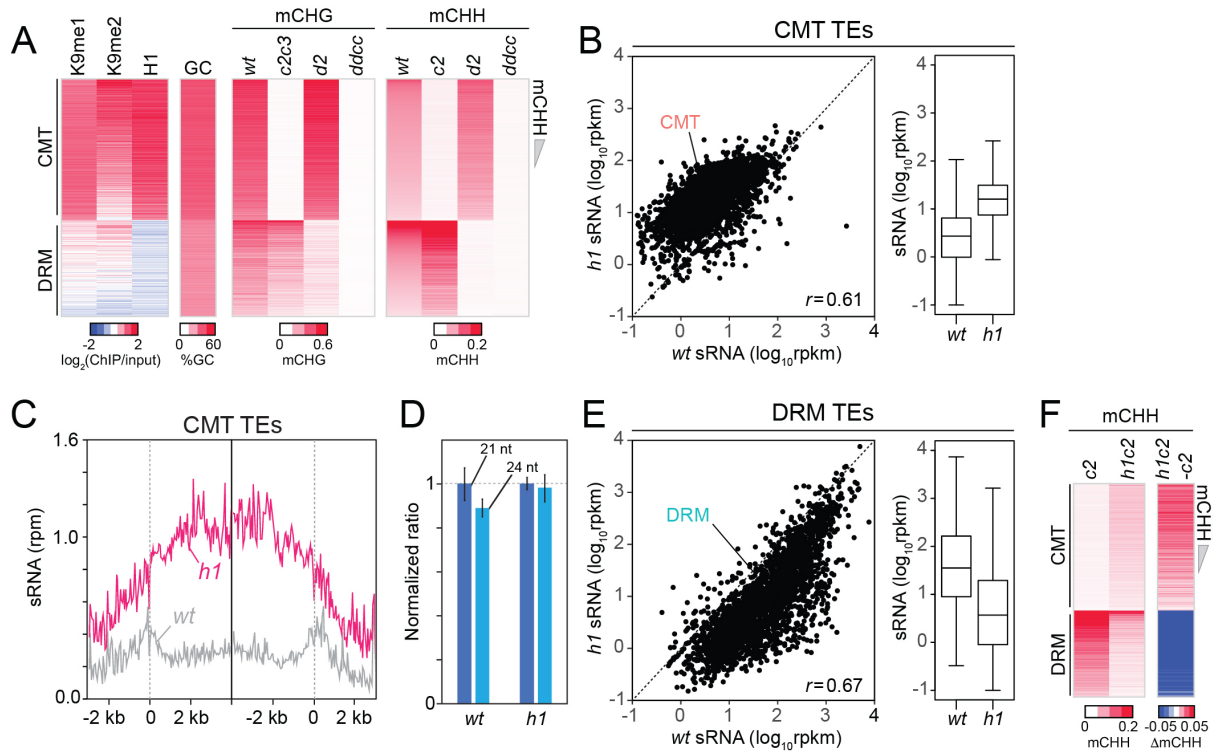

125 **Figure S1** CMT TEs gain non-CG DNA methylation and sRNA expression in *h1* plants.  
 126 **(A)** Heatmaps of H3K9me, H1, GC content, mCHG, and mCHH at CMT and DRM TEs in *wt*,  
 127 *cmt2* (*c2*), *cmt2cmt3* (*c2c3*), *drm2* (*d2*), and *drm1drm2cmt2cmt3* (*ddcc*) plants. TEs were sorted  
 128 by mCHH level in *wt*. **(B)** Average sRNA expression level of CMT TEs in *wt* and *h1* plants.  
 129 **(C)** Average sRNA distribution around CMT TEs in *wt* and *h1* plants. **(D)** Normalized number  
 130 of mapped reads of 21-nt and 24-nt length sRNAs in *wt* and *h1* plants. The number of mapped  
 131 reads of 21-nt sRNA was normalized to 1. **(E)** Average sRNA expression level of DRM TEs  
 132 in *wt* and *h1* plants. **(F)** Heatmaps of mCHH in *c2* and *h1cmt2* (*h1c2*) plants. TEs were sorted  
 133 by mCHH level in *wt*. **(B and E)** rpkm indicates reads per kilobase of transcript, per million  
 134 mapped reads. *r* indicates Pearson's correlation. **(C)** rpm indicates reads per million mapped  
 135 reads.

## 136 **RdDM activity relocates to heterochromatin without H1**

137 To understand how H1 regulates the CMT and DRM pathways, we analyzed 24-nt sRNA  
138 expression, DNA methylation, and H3K9me2 in *hl* plants that have inactivating mutations in  
139 both of the canonical *Arabidopsis* H1 genes (Zemach et al., 2013). Consistent with published  
140 results (Bourguet et al., 2021; Lyons and Zilberman, 2017; Papareddy et al., 2020; Rutowicz  
141 et al., 2015; Zemach et al., 2013), we found an elevation of CHG methylation (mCHG),  
142 H3K9me2 and mCHH at CMT TEs (Figure 1C-D). CMT TEs are depleted of sRNAs in *wt*, but  
143 sRNA expression increases 5.6-fold in *hl* plants (Figure 1D, Figure S1B and S1C). sRNA  
144 expression in *hl* positively correlates with that in *wt* (Figure S1B), indicating that loss of H1  
145 amplifies sRNA expression at RdDM-capable CMT TEs rather than creating *de novo* RdDM  
146 targets.

147 In contrast to the hypermethylation of CMT TEs, DRM TEs lose H3K9me2, mCHG,  
148 mCHH and sRNA expression in *hl* plants (Figure 1C-D and Figure S1E). Despite the loss of  
149 sRNA at DRM TEs, global 24-nt sRNA abundance is not altered in *hl* plants (Figure S1D),  
150 indicating the reallocation of RdDM activity from DRM to CMT TEs. This phenomenon can  
151 be observed within individual TEs, with sRNA biogenesis and mCHH relocating from the AT-  
152 rich edges in *wt* to the GC-rich internal sequences in *hl* (Figure 1E). CMT TE mCHH increases  
153 to the same relative extent in *hl* plants devoid of CMT2 (*hlc2*; Figure 1F and Figure S1F),  
154 indicating that mCHH hypermethylation at CMT TEs in *hl* mutants is caused by RdDM. These  
155 results indicate that RdDM relocates into heterochromatin in the absence of H1 and are  
156 consistent with recently published work (Bourguet et al., 2021; Papareddy et al., 2020).

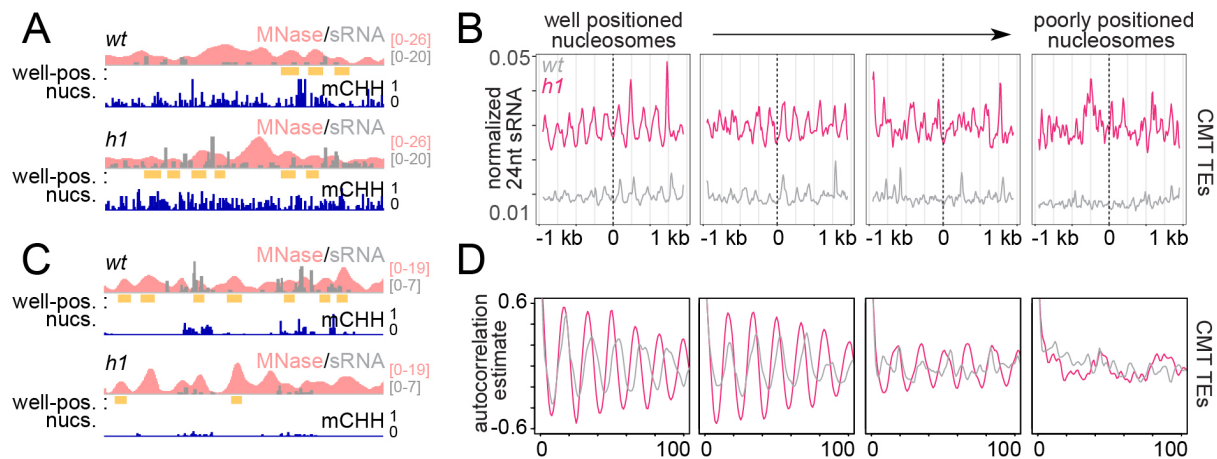

157 **Figure 2** RdDM is preferentially active in linker DNA in *h1* plants.

158 (A and C) Example of a CMT TE (Chr2:3,944,600-3,946,400) (A) and DRM TE  
 159 (Chr2:6,389,500-6,392,500) (C) with well-positioned nucleosomes (yellow boxes). Smoothed  
 160 MNase-seq (apricot), sRNA expression (gray) and mCHH (indigo) are plotted. (B) Average  
 161 sRNA expression around well positioned or poorly positioned nucleosomes at CMT TEs. (D)  
 162 Autocorrelation estimates of average sRNA values shown in (B) to illustrate shortened sRNA  
 163 phasing in *h1* mutants corresponding to shortened nucleosome repeat length.

#### 164 **Lack of H1 promotes sRNA biogenesis in linker DNA**

165 Absence of H1 in *Arabidopsis* causes a preferential increase of heterochromatic TE DNA  
 166 methylation within linker DNA, the regions between nucleosomes (Lyons and Zilberman,  
 167 2017). The average distance between heterochromatic nucleosomes is also reduced from ~180  
 168 to 167 bp (Choi et al., 2020). Given the relative promiscuity of RNA Pol IV initiation (Zhai et  
 169 al., 2015) and the increased sRNA abundance at CMT TEs in *h1* (Figure 1D, Figure S1B and  
 170 S1C), we asked whether patterns of sRNA production with respect to nucleosomes are altered  
 171 in *h1*. As expected, overall levels of sRNA are increased around nucleosomes of CMT TEs and  
 172 decreased at DRM TEs (Figure 2A-C and Figure S2). An overt sRNA linker bias is apparent  
 173 in both *h1* and *wt* around the best-positioned nucleosomes (Figure 2A-C and Figure S2). This  
 174 pattern becomes less obvious at less-well-positioned loci until it disappears completely (Figure





192 *h1cmt2shh1* plants to about the same extent as in *h1cmt2* plants (Figure 3C), demonstrating  
193 that in the absence of H1, Pol IV is recruited to CMT TEs independently of SHH1.

194 Pol IV activity depends on a family of four CLSY putative chromatin remodeling  
195 proteins (Greenberg et al., 2013; Smith et al., 2007; Zhou et al., 2018). Simultaneous loss of  
196 CLSY1 and CLSY2 has the same effect as loss of SHH1, whereas CLSY3 and CLSY4 mediate  
197 RdDM at a largely distinct set of loci (Yang et al., 2018; Zhou et al., 2018). Mutations of SHH1  
198 and CLSY1/2 preferentially reduce mCHH and sRNA at DRM TEs and increase mCHH at  
199 CMT TEs (Figure 3C). In contrast, *clsy3/4* mutant plants have reduced mCHH and sRNA at  
200 CMT TEs and increased mCHH and sRNA at DRM TEs (Figure 3C), suggesting that SHH1  
201 and CLSY1/2 preferentially mediate RdDM at DRM TEs, whereas CLSY3/4 preferentially  
202 recruit Pol IV to CMT TEs. Consistently, TEs hypermethylated in *h1cmt2* and *h1cmt2shh1*  
203 show a strong overlap with published CLSY3/4-dependent sRNA clusters and little overlap  
204 with CLSY1/2-dependent clusters (Figure 3D and Figure S3). Overall, our results indicate that  
205 SHH1 is relatively unimportant for RdDM activity at H3K9me-rich CMT TEs with or without  
206 H1. The entry of Pol IV into H1-depleted heterochromatin must either involve a different  
207 H3K9me interacting factor, or a chromatin feature other than H3K9me.



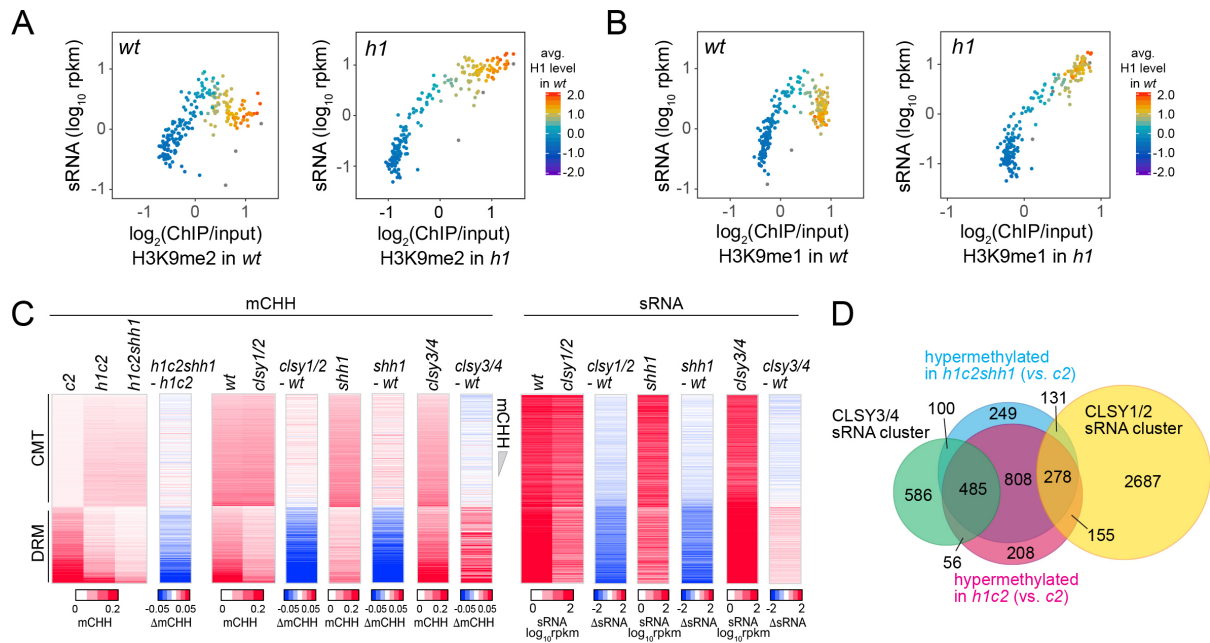

208 **Figure 3** SHH1 is not required for non-CG hypermethylation in *h1*.

209 **(A and B)** Average H3K9me2 **(A)** or H3K9me1 **(B)** (x-axis) and sRNA expression level (y-  
 210 axis) in *wt* and *h1*. Each dot represents the average of 100 TEs sorted by GC content. **(C)**  
 211 Heatmaps of mCHH and sRNA expression at CMT and DRM TEs in plants with *shh1* or *clsy*  
 212 mutations. **(D)** Venn diagram of TEs in indicated categories.

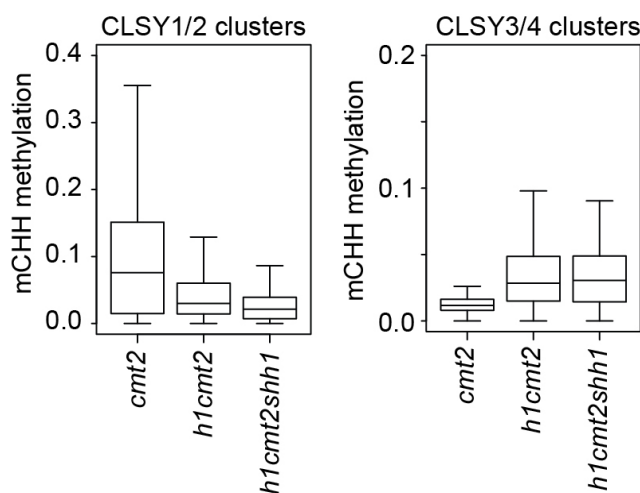

213 **Figure S3** Loss of *h1* causes CMT2-independent hypermethylation at TEs with CLSY3/4  
 214 sRNA clusters. Boxplots show mCHH at TEs within indicated CLSY clusters.

## 215 **RdDM expansion does not require CG methylation**

216 Our results suggest that sRNA biogenesis at CMT TEs in *h1* mutants is mediated by CLSY3/4  
217 Pol IV complexes. Recruitment of these complexes has been proposed to involve CG  
218 methylation (mCG) (Zhou et al., 2018). Therefore, we examined sRNA levels and DNA  
219 methylation in *h1met1* mutants (Choi et al., 2020). Although MET1 is a CG methyltransferase,  
220 its loss also perturbs non-CG methylation and H3K9me2 at some CMT TEs (Figure 4A and  
221 Figure S4A) (Choi et al., 2020; Deleris et al., 2012; Yaari et al., 2015; Zabet et al., 2017; Y.  
222 Zhang et al., 2018). To understand how these changes impact sRNA production, we  
223 differentiate between two groups of CMT TEs in *met1* plants. MET1-independent CMT TEs  
224 keep non-CG methylation and H3K9me2 in *met1* (Figure S4A) (Choi et al., 2020) and  
225 accordingly maintain sRNA expression (Figure 4B). These CMT TEs gain sRNA expression  
226 and mCHH in *h1met1* relative to *met1* and *wt* (Figure 4B), demonstrating that mCG is not  
227 required for RdDM expansion into heterochromatin caused by H1 loss. In contrast, MET1-  
228 dependent CMT TEs, which lose non-CG methylation and H3K9me in *met1* (Figure S4A)  
229 (Choi et al., 2020), lose sRNA in *met1* and do not recover sRNA expression or mCHH in  
230 *h1met1* (Figure 4C), suggesting that non-CG methylation or H3K9me is necessary for sRNA  
231 biogenesis.

232 To test the above hypothesis, we grouped CLSY3/4 targets by mCHH level in *met1*  
233 ( $mCHH \geq 0.05$  in *wt* and *met1*;  $mCHH \geq 0.05$  in *wt* and  $< 0.05$  in *met1*). Even though all CLSY3/4  
234 targets lose mCG in *met1*, sRNA expression is reduced only when non-CG methylation and  
235 H3K9me2 are reduced (Figure 4D and Figure S4B), implying that the presence of non-CG  
236 methylation and/or H3K9me is sufficient to maintain CLSY3/4-dependent sRNA biogenesis.  
237 In *h1met1*, sRNA levels increase at CLSY3/4 targets where non-CG methylation is maintained:  
238 among 1565 CLSY3/4 clusters with *wt* non-CG methylation ( $> 0.01\%$ ), 72% keep non-CG  
239 methylation in *met1* and gain sRNA expression in *h1met1*, whereas 28% lose non-CG

240 methylation in *met1* and have similarly low sRNA levels in *met1* and *h1met1* (Figure 4E and  
 241 Figure S4C). These results indicate that neither CLSY3/4 Pol IV activity, nor the RdDM  
 242 expansion triggered by loss of H1, depend on mCG.

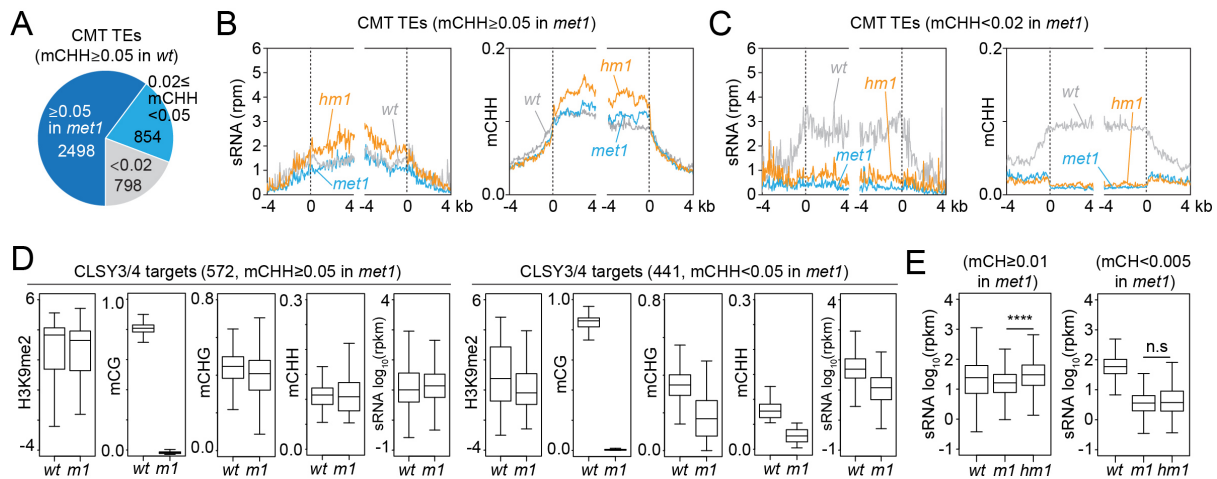

243 **Figure 4** sRNA expression at CLSY3/4 clusters is independent of mCG.

244 **(A)** The number of CMT TEs (mCHH $\geq$ 0.05 in *wt*) that maintain mCHH in *met1* (mCHH $\geq$ 0.05  
 245 in *met1*; 2498) or lose mCHH in *met1* (mCHH<0.02 in *met1*; 798). **(B and C)** Averaged sRNA  
 246 distribution and mCHH levels around CMT TEs in *wt*, *met1*, and *h1met1* (*hml*) plants that  
 247 maintain mCHH in *met1* (mCHH $\geq$ 0.05 in *met1*; **B**) and lose mCHH in *met1* (mCHH<0.02 in  
 248 *met1*; **C**). **(D)** Boxplots of H3K9me2, DNA methylation, and sRNA expression at CLSY3/4  
 249 sRNA clusters in *wt* and *met1* (*m1*). CLSY3/4 clusters that maintain more than 5% mCHH in  
 250 *met1* or less than 5% mCHH in *met1* are plotted separately. **(E)** sRNA expression level at  
 251 CLSY3/4 sRNA clusters that maintain non-CG methylation (mCH $\geq$ 0.01) in *met1* or lose non-  
 252 CG methylation (mCH<0.005) in *met1*. Non-CG methylation (mCH) density equals number of  
 253 mCH sites per base pair.

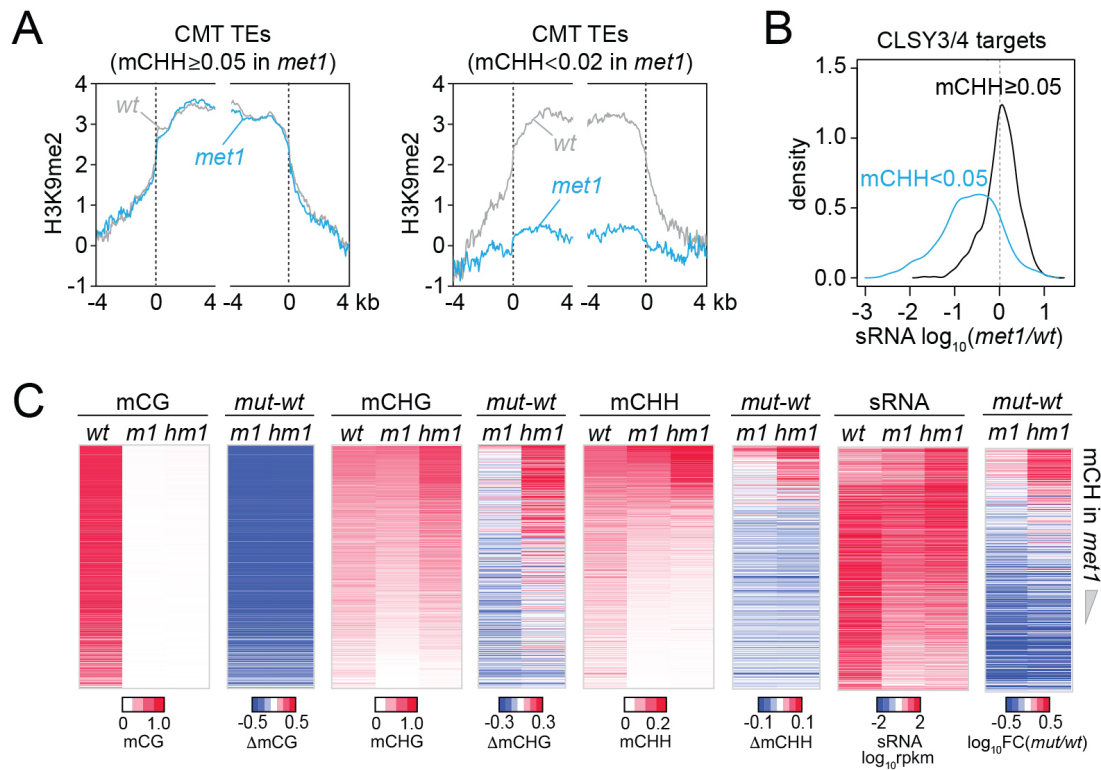

254 **Figure S4** DNA methylation and sRNA expression changes in *met1* and *h1met1*.

255 **(A)** H3K9me2 levels around CMT TEs that maintain mCHH (mCHH $\geq$ 0.05) in *met1* and lose  
 256 mCHH (mCHH $<$ 0.02) in *met1*. **(B)** Kernel density distribution of sRNA expression changes at  
 257 CLSY3/4 sRNA clusters in *met1* (vs. *wt*) that maintain more than 5% mCHH in *met1* or less  
 258 than 5% mCHH in *met1*. **(C)** Heatmaps of DNA methylation and sRNA expression at CMT  
 259 TEs in *wt*, *met1* (*m1*), and *h1met1* (*hm1*). TEs were sorted by non-CG methylation level (mCH)  
 260 in *met1*.

### 261 Severe H3K9me reduction does not perturb RdDM expansion into heterochromatin

262 Our results so far indicate that H1 prevents RdDM from following a gradient of either H3K9me  
 263 or non-CG methylation into heterochromatin. However, heterochromatin is structurally  
 264 complex and contains many factors (Feng and Michaels, 2015). To understand the overall  
 265 importance of heterochromatin integrity, we tested the effects of H1 on sRNA distribution in  
 266 plants with a mutation in the Swi/Snf2 chromatin remodeler DDM1, which have severely

267 compromised heterochromatin (Kim and Zilberman, 2014; Sigman and Slotkin, 2016). The  
268 *ddm1* mutation greatly reduces heterochromatic DNA and H3K9 methylation (Ito et al., 2015;  
269 Lyons and Zilberman, 2017; Osakabe et al., 2021; Teixeira et al., 2009; Zemach et al., 2013),  
270 activates TE expression (Lippman et al., 2004; Osakabe et al., 2021; Panda et al., 2016; Panda  
271 and Slotkin, 2020; Rougée et al., 2020) and disperses nuclear heterochromatic foci (Rougée et  
272 al., 2020; Soppe et al., 2002) (Figure 5A-B and Figure S5A). However, 24-nt sRNA expression  
273 in *ddm1* is broadly similar to *wt* (Figure 5C-D and Figure S5B). Simultaneous lack of H1 and  
274 DDM1 in *h1ddm1* mutants (Lyons and Zilberman, 2017; Zemach et al., 2013) causes relocation  
275 of sRNA biogenesis into CMT TEs that mirrors that in *h1* plants (Figure 5C and Figure S5B),  
276 indicating that overall heterochromatin integrity is not required for this process. Furthermore,  
277 RdDM expansion into heterochromatin occurs in *h1ddm1* despite strong H3K9me reduction  
278 compared to *wt* and *h1* (Figure 5A-B and Figure S5A). This does not rule out the possibility  
279 that H3K9me promotes Pol IV activity, because the H3K9me remaining in *h1ddm1* may be  
280 sufficient. However, the observation that sRNA production at CMT TEs is largely unaffected  
281 by a bulk H3K9me reduction argues against a primary role for H3K9me in Pol IV recruitment.

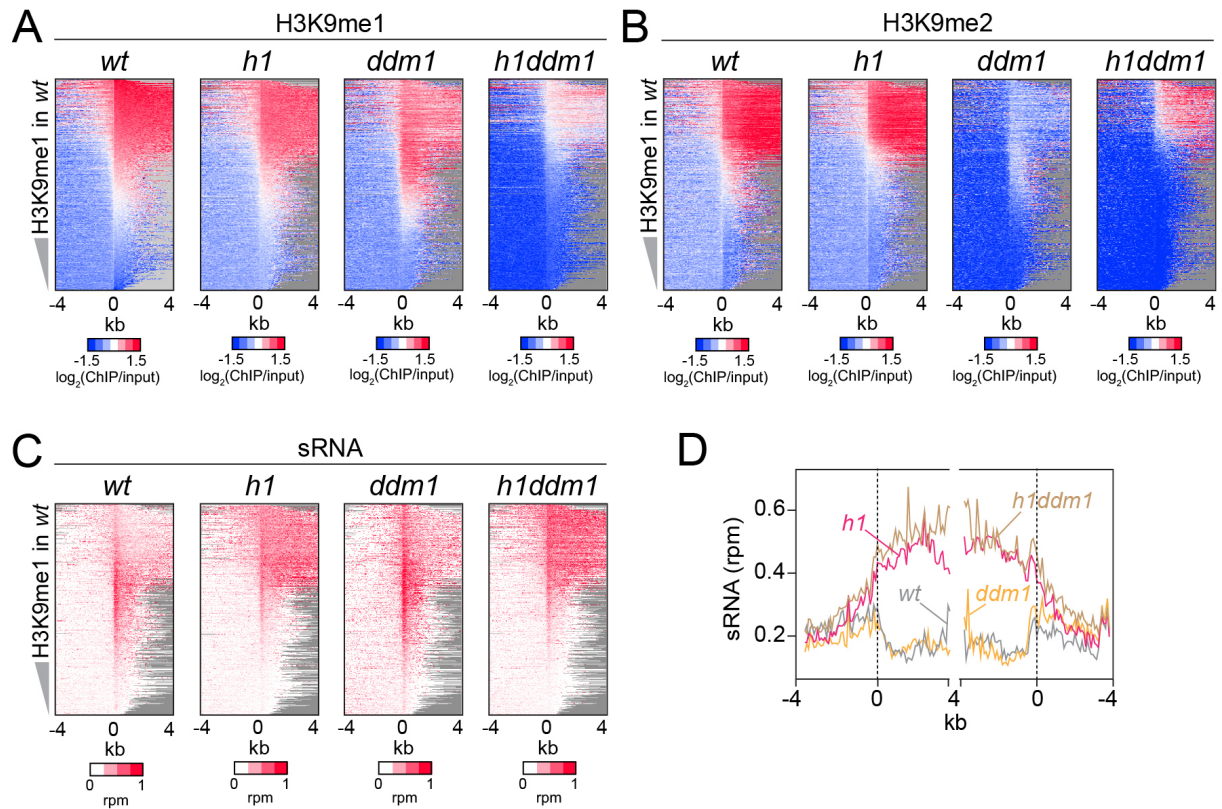

282 **Figure 5** Severely reduced H3K9 methylation does not prevent sRNA expansion.

283 (A-C) Distribution of H3K9 methylation (A and B) and sRNA expression (C) around 5' ends

284 of TEs in *wt*, *h1*, *ddm1*, and *h1ddm1* plants. (D) Averaged sRNA distribution around CMT TEs

285 in *wt*, *h1*, *ddm1*, and *h1ddm1* plants.



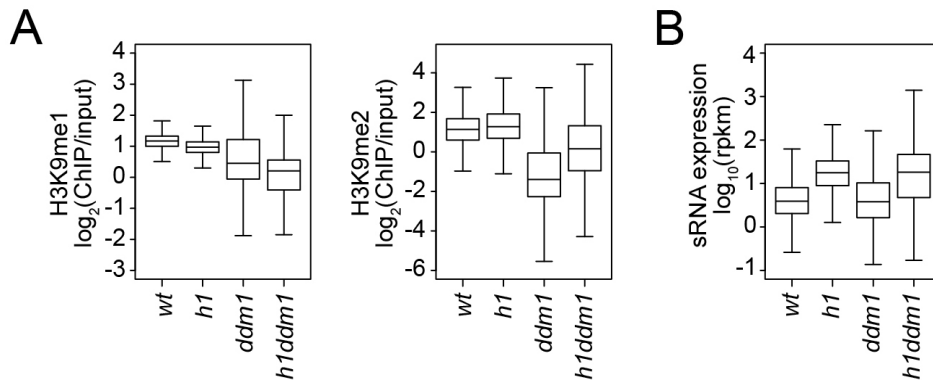

286 **Figure S5** sRNA expression and H3K9 methylation changes in *h1*, *ddm1* and *h1ddm1*.

287 **(A and B)** Boxplots of H3K9 methylation levels **(A)** and sRNA expression **(B)** at CMT TEs in  
288 *wt*, *h1*, *ddm1*, and *h1ddm1* plants.

### 289 **H3K9me and non-CG methylation can be decoupled in heterochromatin**

290 H3K9me and non-CG DNA methylation are closely associated in heterochromatin due to the  
291 feedback loop between CMT2/3 and the SUVH4/5/6 H3K9 methyltransferases (Du et al., 2012;  
292 Stoddard et al., 2019; Stroud et al., 2014). To isolate the effects of these features on sRNA  
293 biogenesis, we examined DNA methylation, H3K9me and sRNA levels in *c2c3* and *h1c2c3*  
294 plants. While CG methylation is largely unaffected, non-CG methylation is specifically  
295 abolished at CMT TEs in these plants (Figure S6A), consistent with previously published *c2c3*  
296 results (Stroud et al., 2014). As expected, H3K9me is also greatly reduced (Figure S6A), but  
297 some H3K9me1 and H3K9me2 remains in heterochromatin. Specifically, 875 CMT TEs  
298 maintain H3K9me1 and 1126 maintain H3K9me2 in *c2c3*, while in *h1c2c3* we identified 2434  
299 H3K9me1-enriched CMT TEs and 1443 H3K9me2-enriched CMT TEs (Figure 6A and 6B).  
300 Principal component analysis shows that H3K9me in these mutants associates with mCG,  
301 followed by CG and CCG density (which contributes to mCG density; Figure 6C and S6B),  
302 suggesting that SUVH4/5/6 are recruited to mCG in the absence of non-CG methylation.

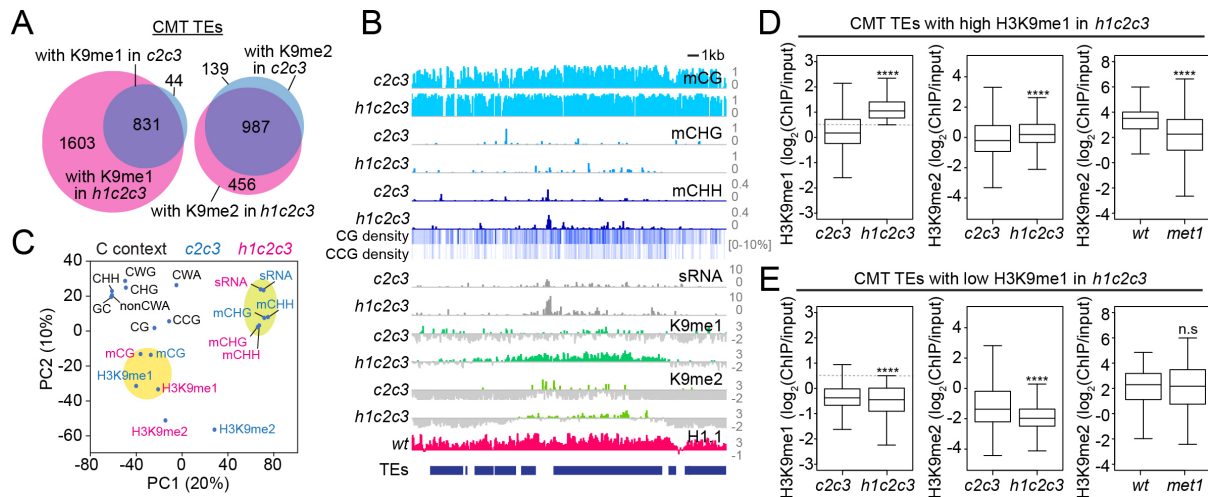

303 **Figure 6** Non-CG DNA methylation and H3K9 methylation are decoupled in *h1c2c3*.

304 **(A)** Number of CMT TEs with H3K9 methylation (average H3K9me1 (K9me1) or H3K9me2  
 305 (K9me2) > 0.5) in *cmt2cmt3* (*c2c3*) or *h1cmt2cmt3* (*h1c2c3*) plants. **(B)** Example of DNA  
 306 methylation, CG and CCG density, H1 level, H3K9 methylation and sRNA expression around  
 307 CMT TEs in *c2c3* and *h1c2c3* plants (Chr3:14,495,000-14,520,000). **(C)** Principal component  
 308 analysis of H3K9me, cytosine content (total GC content, CG, CCG, CHG, CHH, CWG, CWA,  
 309 and nonCWA (W=A and T)), DNA methylation, and sRNA expression in *c2c3* and *h1c2c3*  
 310 plants. **(D and E)** H3K9me levels at CMT TEs with high H3K9me1 (H3K9me1 ≥ 0.5; **D**) or  
 311 low H3K9me1 (H3K9me1 < 0.5; **E**) in *h1c2c3* plants.

312 This conclusion is supported by a complementary pattern of H3K9 methylation changes  
 313 in *h1c2c3* vs. *met1*. TEs that lose H3K9me2 in *met1*, suggesting H3K9me dependence on mCG,  
 314 maintain H3K9me in the absence of mCHG/mCHH in *h1c2c3* (Figure 6D). Conversely, TEs  
 315 that lose H3K9me in *h1c2c3*, suggesting H3K9me dependence on mCHG/mCHH, retain  
 316 H3K9me2 in *met1* (Figure 6E). This indicates that H3K9me at mCG-dense CMT TEs is  
 317 partially dependent on mCG, leading to considerable H3K9me retention in *c2c3*, and especially  
 318 *h1c2c3* plants. The ability of mCG to recruit H3K9me is consistent with published work,  
 319 including studies that show RdDM-independent initiation of the CMT-SUVH feedback loop



320 specifically at CG-methylated sequences (Miura et al., 2009; To et al., 2020; Zabet et al., 2017)  
 321 and the observed affinity of SUVH histone methyltransferase SRA domains for mCG *in vitro*  
 322 (Johnson et al., 2007; Li et al., 2018; Rajakumara et al., 2011).

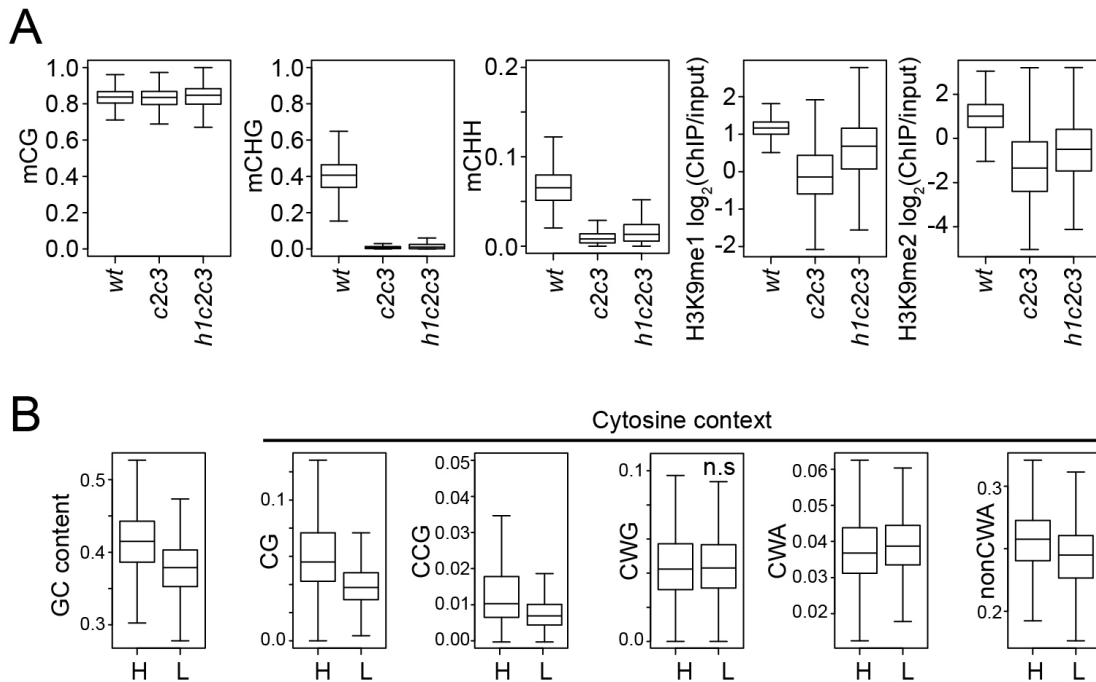

323 **Figure S6** Analysis of chromatin features at CMT TEs.

324 **(A)** Boxplots of DNA methylation and H3K9 methylation levels at CMT TEs in *wt*, *cmt2cmt3*  
 325 (*c2c3*), and *h1cmt2cmt3* (*h1c2c3*) plants. **(B)** Cytosine context density (total GC content, CG,  
 326 CCG, CWG, CWA, and nonCWA (W=A and T)) at CMT TEs with high H3K9me1 (H3K9me1  
 327  $\geq 0.5$ ; H) and low H3K9me1 (H3K9me1  $< 0.5$ ; L) in *h1c2c3* plants.

### 328 **24-nt sRNA production specifically correlates with non-CG methylation**

329 The decoupling of H3K9me and non-CG methylation in *h1c2c3* plants allowed us to determine  
 330 how each feature is associated with sRNA biogenesis. In *h1* plants, H3K9me2, DNA  
 331 methylation in every context, and sRNA expression together increase in direct relation to *wt*  
 332 H1 prevalence, as loss of H1 increases accessibility of previously H1-rich TEs (Figure 7A and  
 333 Figure S7A) (Bourguet et al., 2021; Lyons and Zilberman, 2017; Papareddy et al., 2020;

334 Zemach et al., 2013). H3K9me1/2, DNA methylation, and sRNA levels are also all positively  
335 correlated in *hl* plants, though the correlation between H3K9me2 and sRNA is weak (Figure  
336 7B and Figure S7B). In contrast, the coupling of H3K9me with DNA methylation and sRNA  
337 levels nearly disappears when comparing *hlc2c3* to *c2c3* (Figure 7C-D and Figure S7C-D).  
338 Relative H3K9me1/2 abundance increases with *wt* H1 levels, whereas DNA methylation and  
339 sRNA changes show at best a very weak relationship with *wt* H1 enrichment (Figure 7C and  
340 Figure S7C). Two correlated groups remain in *hlc2c3*: H3K9me1/2 with mCG, and sRNA  
341 with mCHG/mCHH (Figure 7D and Figure S7D). The linear correlations between sRNA and  
342 either H3K9me1 or mCG observed in *hl* (Figure 7E) become kinked in *hlc2c3* (Figure 7F).  
343 Only the association between non-CG methylation and sRNA remains linear (Figure 7E and  
344 7F). This dynamic can be observed at an individual array of CMT TEs (Figure 7G). 24-nt  
345 sRNA expression is confined to the edges of the CMT TE array in *wt*, but follows H3K9me  
346 and DNA methylation throughout the array in *hl* plants (Figure 7G). In *hlc2c3*, non-CG  
347 methylation within the array is strongly reduced, but H3K9me is maintained, and sRNA  
348 expression is associated with remaining mCHH but not with H3K9me (Figure 7G). Altogether,  
349 these results do not support the hypothesis that Pol IV is recruited by H3K9me, and offer non-  
350 CG methylation as the most likely alternative.

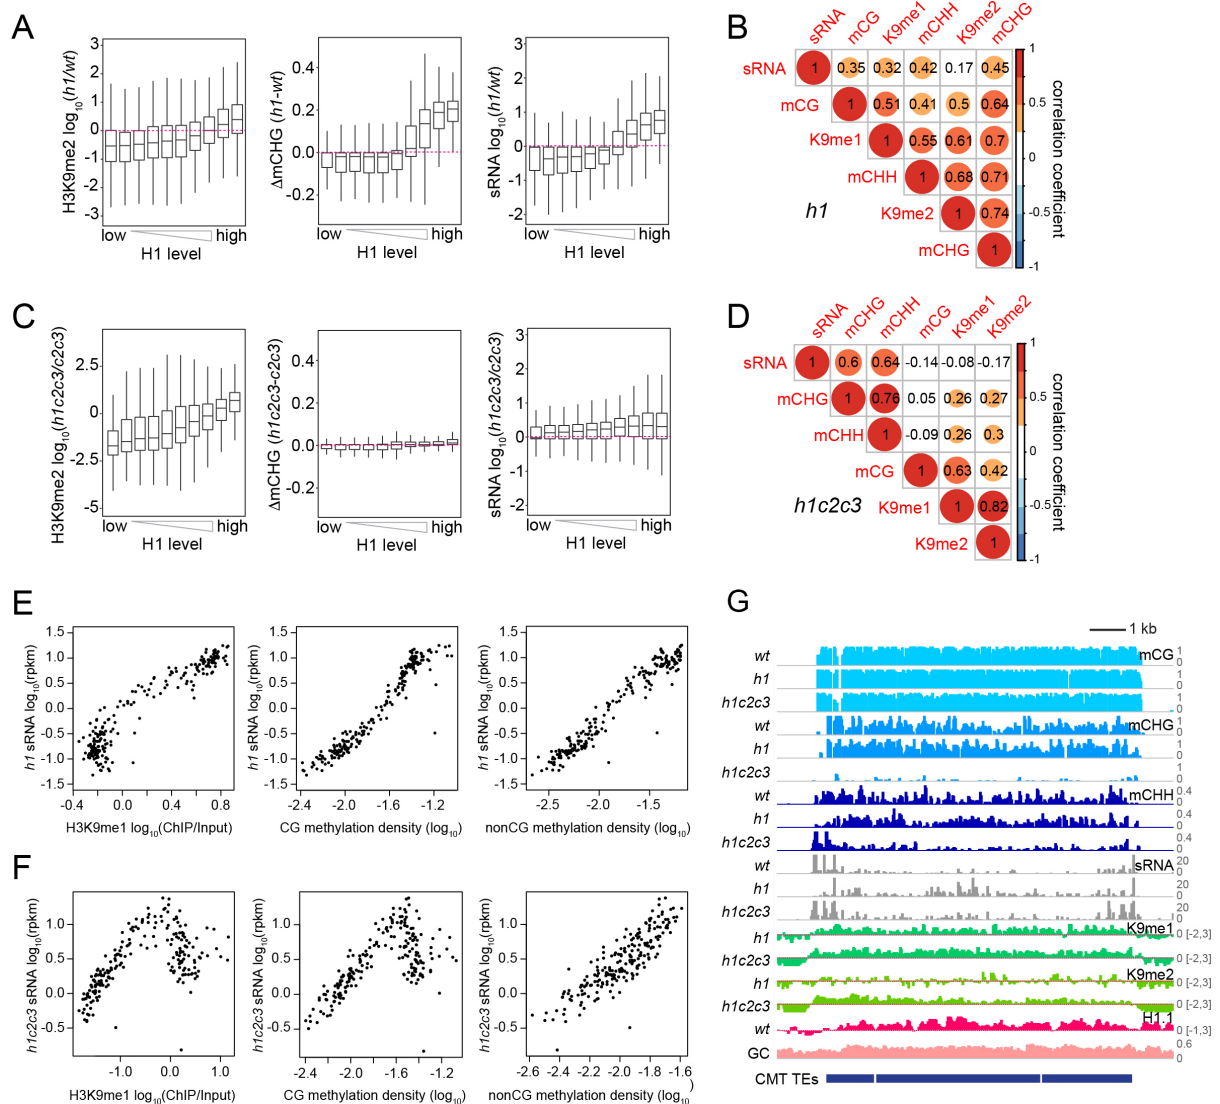

351 **Figure 7** sRNA expression specifically correlates with non-CG methylation.  
 352 **(A and C)** Boxplots of H3K9me2, mCHG, and sRNA expression changes in *h1* vs. *wt* **(A)** and  
 353 *h1c2c3* vs. *c2c3* **(C)**. **(B and D)** Correlation among H3K9 methylation, DNA methylation, and  
 354 sRNA expression in *h1* plants **(B)** and *h1c2c3* plants **(D)**. **(E and F)** sRNA expression relation  
 355 to H3K9me1, CG and non-CG methylation density in *h1* plants **(E)** and *h1c2c3* plants **(F)**.  
 356 Each dot represents the average of 100 TEs sorted by GC content. DNA methylation density  
 357 equals number of methylated sites per base pair. **(G)** Example of DNA methylation, sRNA  
 358 expression, H3K9 methylation (K9me1 and K9me2), and H1.1 distribution at CMT TEs in *wt*,  
 359 *h1*, and *h1c2c3* plants (Chr2:6,548,000-6,559,000).

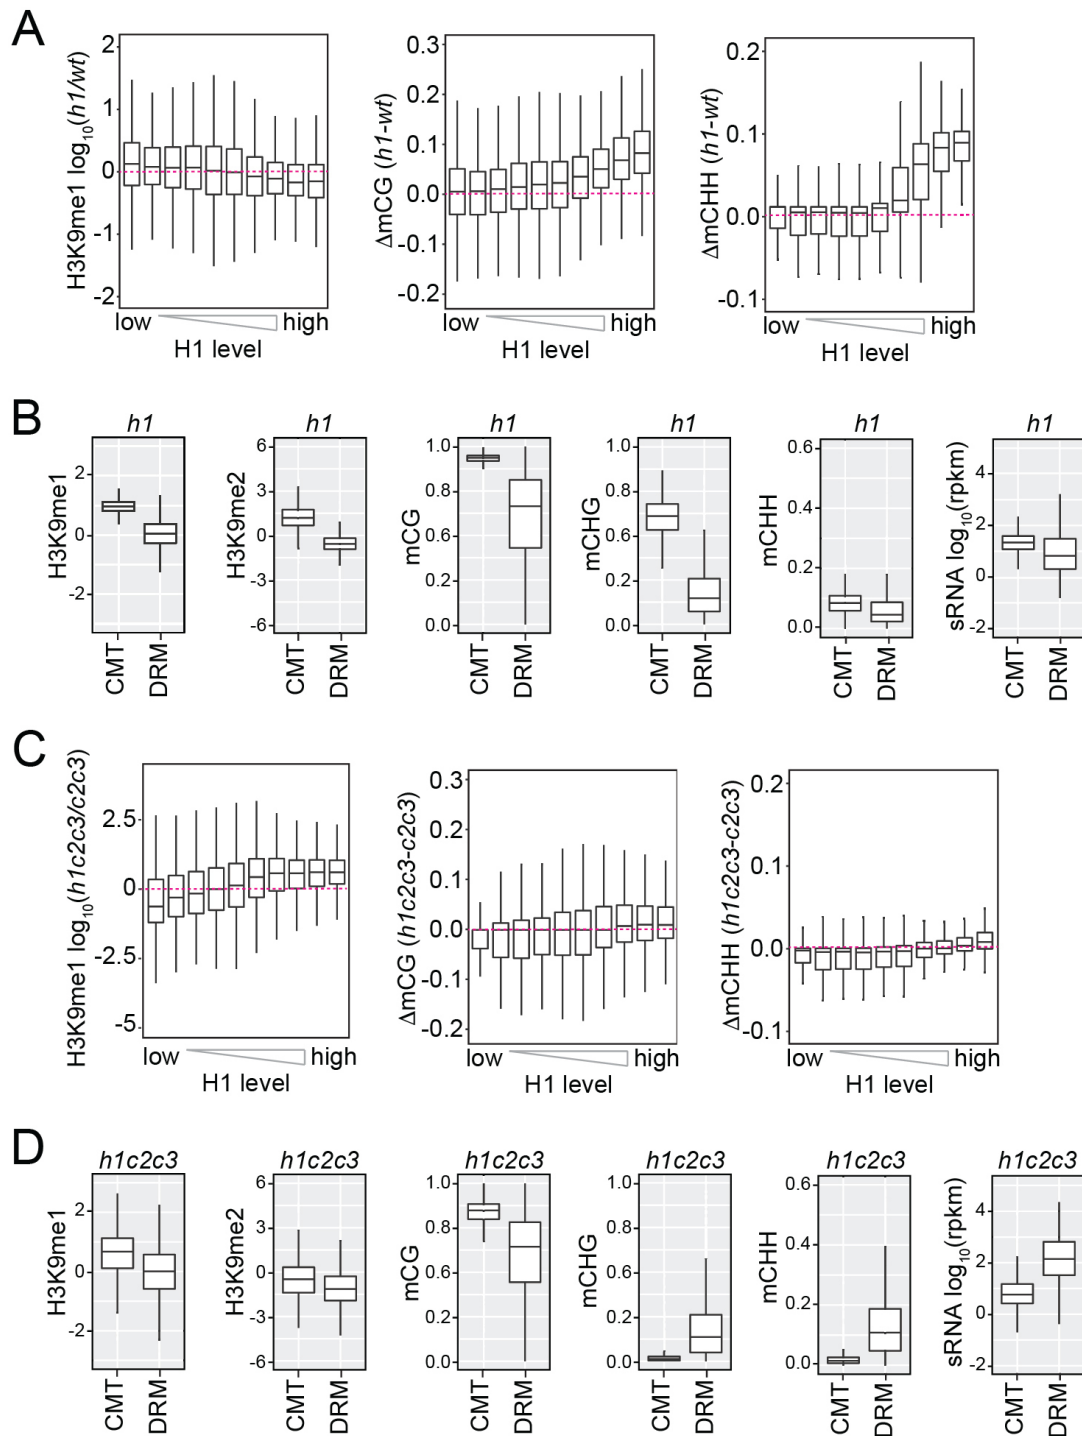

360 **Figure S7** H3K9 methylation, DNA methylation and sRNA expression in *h1* and *h1c2c3* plants.

361 (A and C) Boxplots of H3K9me1, mCG and mCHH methylation change in *h1* vs. *wt* (A) and

362 *h1c2c3* vs. *c2c3* (C). (B and D) Boxplots of H3K9 methylation, DNA methylation, and sRNA

363 expression levels at CMT and DRM TEs in *h1* plants (B) and *h1c2c3* plants (D).

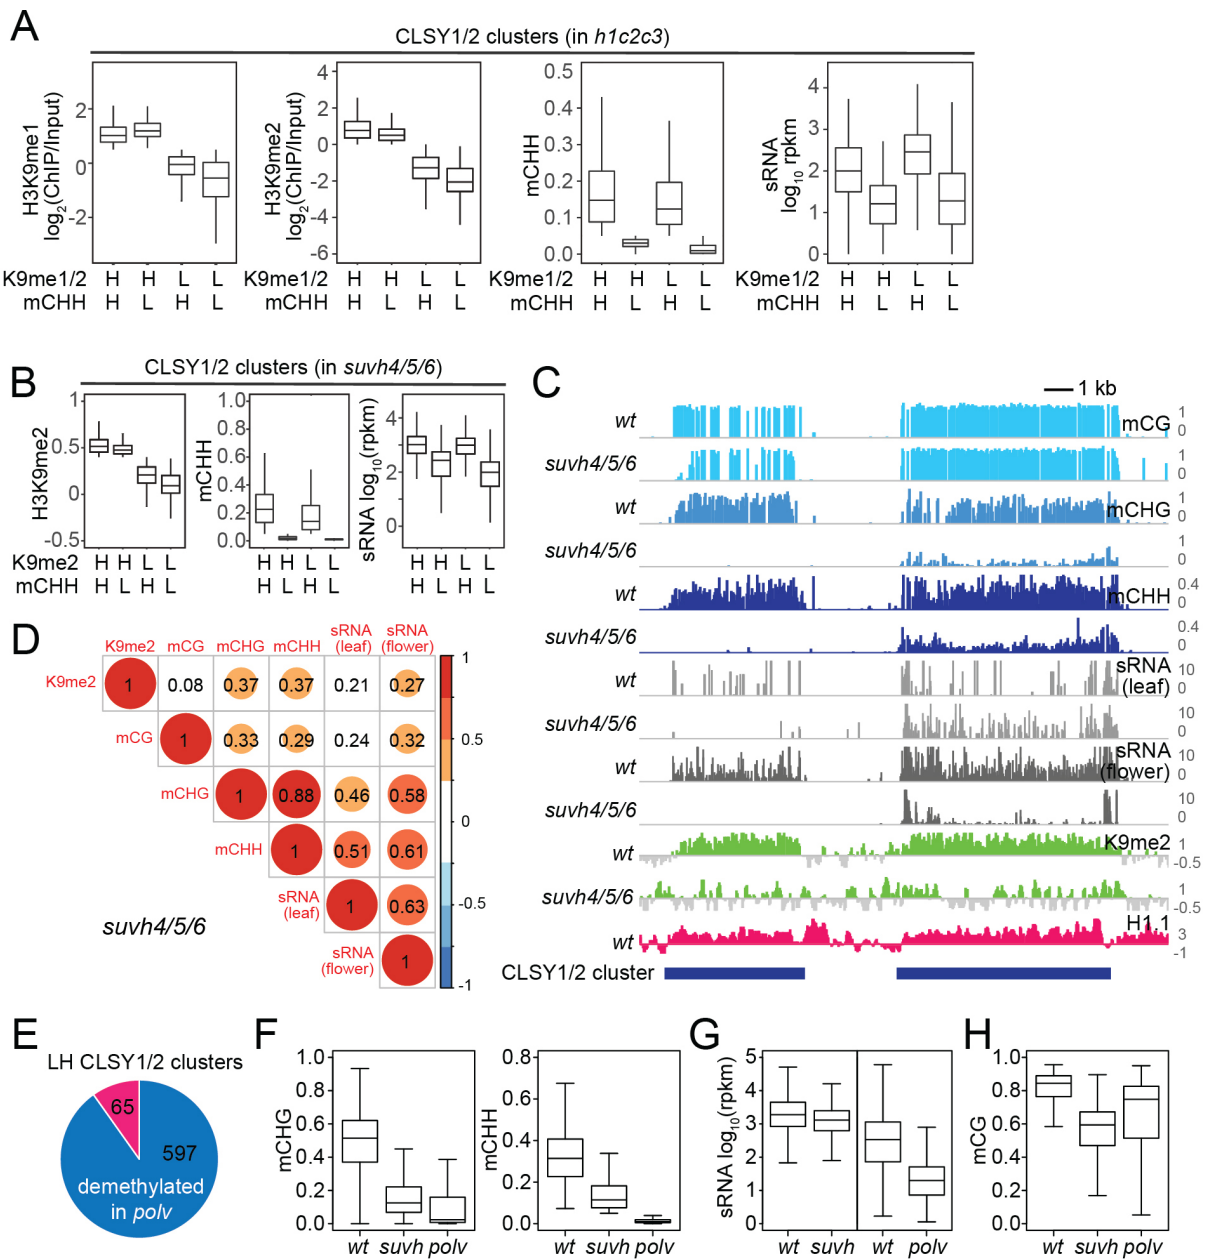

364 **Figure 8** CLSY1/2-dependent sRNA expression is associated with non-CG methylation.  
 365 **(A)** Boxplots of H3K9me1, H3K9me2, mCHH and sRNA expression levels at CLSY1/2-  
 366 dependent sRNA clusters in *h1c2c3* plants. sRNA clusters were classified by H3K9  
 367 methylation level (H3K9me1>0.5, H3K9me2>0 as high H3K9me (H), and the rest as low  
 368 H3K9me (L)) and mCHH level (mCHH>0.05 as high mCHH (H) and the rest as low mCHH  
 369 (L)). **(B)** Boxplots of H3K9me2, mCHH and sRNA expression levels at CLSY1/2-dependent  
 370 sRNA clusters in *suvh4/5/6* plants. sRNA clusters were classified by H3K9me2 level  
 371 (H3K9me2>0 as high H3K9me2 (H) and the rest as low H3K9me2 (L)) and mCHH level as in

372 (A). (C) Examples of CLSY1/2 sRNA clusters with high H3K9me2 in *suvh4/5/6* but different  
373 non-CG methylation levels (Chr1:17,520,000-17,538,000). (D) Correlation among H3K9me2,  
374 DNA methylation, and sRNA expression in *suvh456* plants. (E) Overlap between H3K9me2  
375 low/mCHH high CLSY1/2 clusters (LH) in *suvh4/5/6* plants and mCHH demethylated  
376 CLSY1/2 clusters in *polv* plants. (F-H) Boxplots of non-CG methylation levels (F), sRNA  
377 expression (G), and mCG levels (H) at 597 CLSY1/2 clusters that lose mCHH in *plov* (blue in  
378 panel E).

### 379 **CLSY1/2 RdDM activity specifically associates with non-CG methylation**

380 24-nt sRNA expression is globally associated with non-CG methylation rather than H3K9me  
381 in *h1c2c3*, but these correlations are primarily driven by heterochromatic regions with low *wt*  
382 RdDM. To determine if this trend translates to euchromatic TEs where SHH1 is required for  
383 RdDM, we analyzed associations between H3K9me, DNA methylation, and sRNA expression  
384 in published CLSY1/2 sRNA clusters in *wt* plants (Figure 8A) (Zhou et al., 2018). In clusters  
385 grouped by H3K9me and mCHH, sRNA expression is associated with high mCHH, but not  
386 with high H3K9me (Figure 8A), supporting the idea that non-CG methylation dictates Pol IV  
387 localization.

388 As a further test of our hypothesis, we analyzed published data from plants lacking the  
389 three H3K9 methyltransferases implicated in the CMT/SUVH positive feedback loop. In these  
390 *suvh4/5/6* mutants, H3K9me2 and non-CG methylation are strongly diminished and sRNA  
391 expression of CLSY1/2 clusters is decreased (Stroud et al., 2014; Zhou et al., 2018). If  
392 H3K9me2 recruits Pol IV via SHH1, the limited remaining H3K9me would be expected to  
393 correlate with sRNA. Instead, we find sRNA expression in *suvh4/5/6* follows mCHH but not  
394 H3K9me2 (Figure 8B-C, compare left and right elements in 8C), consistent with our  
395 observations in heterochromatin. 24-nt sRNA correlates much more strongly with non-CG

396 methylation than with H3K9me2 in *suvh4/5/6* plants (Figure 8D), highlighting the limited  
397 importance of H3K9me for sRNA biogenesis.

398 Finally, we assayed CLSY1/2 clusters with low *wt* H3K9me2 but high *wt* sRNA and  
399 mCHH (LH CLSY1/2 clusters) in *polv* mutants to determine whether non-CG methylation is  
400 required to maintain sRNA expression. RNA Pol V is not directly involved in sRNA production,  
401 but is an essential RdDM component required for DNA methylation because it recruits DRM2  
402 (Erdmann and Picard, 2020; Matzke and Mosher, 2014; Raju et al., 2019; Wendte and Pikaard,  
403 2017). 90% of the 662 LH CLSY1/2 clusters lose mCHH in *polv* plants (mCHH<0.05, Figure  
404 8E), and the overall non-CG methylation of LH CLSY1/2 clusters is greatly reduced without  
405 Pol V (Figure 8F). In *suv4/5/6* mutants, LH CLSY1/2 clusters maintain sRNA expression,  
406 whereas sRNA expression in *polv* mutants is greatly reduced (Figure 8G). Furthermore, mCG  
407 at LH CLSY1/2 clusters is higher in *polv* than in *suvh4/5/6* plants (Figure 8H). Therefore,  
408 sRNA biogenesis is not sensitive to the loss of either H3K9me2 or mCG and specifically  
409 requires non-CG methylation.

## 410 **Discussion**

411 We have examined intertwined chromatin features – sRNA production, DNA methylation, and  
412 H3K9 methylation – to understand how the genomic sites of Pol IV activity are specified. We  
413 find that two main factors are involved. First, linker histone H1 prevents sRNA production in  
414 heterochromatin (Figure 9). Without H1, RdDM relocates from its usual euchromatic targets  
415 into heterochromatic TEs (Figure 1 and Figure S1), as has been recently observed by an  
416 independent study (Papareddy et al., 2020). Another heterochromatic protein, the histone  
417 variant H2A.W, may also contribute to the exclusion of RdDM from heterochromatin, but this  
418 effect is modest and only observed when H1 is absent (Bourguet et al., 2021). In the presence  
419 of H1, lack of H2A.W instead strengthens the exclusion of RdDM from heterochromatin,



420 potentially due to enhanced heterochromatic H1 accumulation (Bourguet et al., 2021). Overall,  
421 the available evidence indicates that H1 is the major factor excluding Pol IV from  
422 heterochromatin.

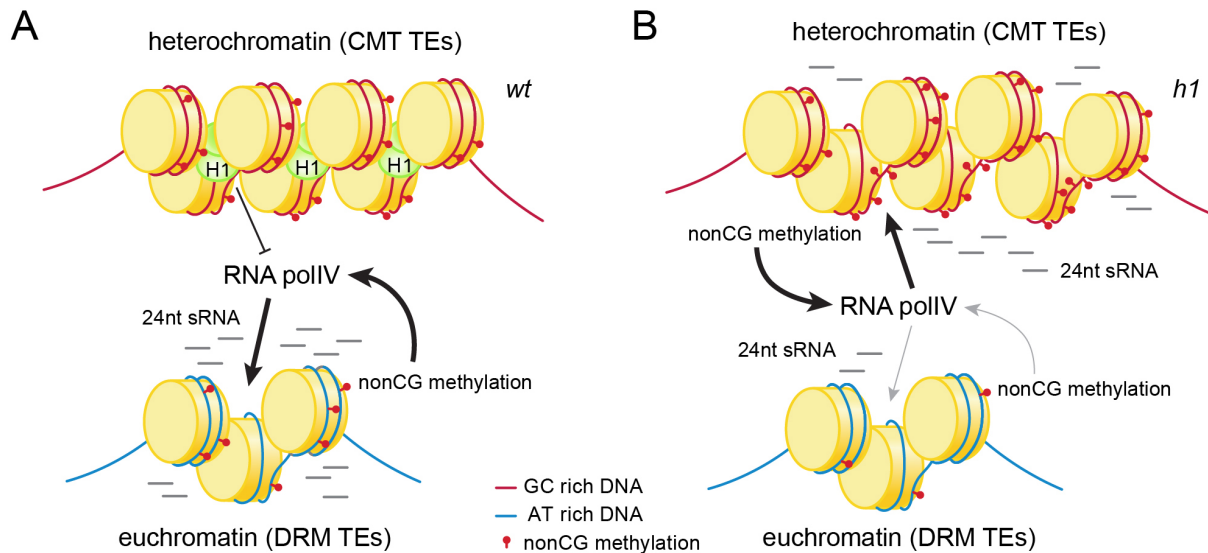

423 **Figure 9** Histone H1 prevents non-CG methylation-mediated small RNA biogenesis in  
424 *Arabidopsis* heterochromatin.

425 **(A)** In *wt* plants, H1 binds to GC-rich CMT TEs to restrict access of RNA polymerase IV (pol  
426 IV). Pol IV binds to DRM TEs and produces sRNA. **(B)** In *h1* plants, RNA pol IV can  
427 transcribe non-CG methylated CMT TEs to produce 24-nt sRNA, which leads to DNA  
428 methylation of CMT TEs and reduced activity at DRM TEs.

429 Second, we find that non-CG methylation promotes Pol IV activity (Figure 9), contrary  
430 to the well-established view that Pol IV is recruited by H3K9me (Erdmann and Picard, 2020;  
431 Law et al., 2013; Raju et al., 2019; Wendte and Pikaard, 2017; Zhang et al., 2013), and the  
432 more recent proposal that mCG may be involved (Zhou et al., 2018). The hypothesis that non-  
433 CG methylation recruits Pol IV has a long history (Herr et al., 2005; Li et al., 2020; Zemach et  
434 al., 2013), but testing it has been challenging because non-CG methylation is associated with



435 other epigenetic and chromatin features, including mCG and H3K9me (Law and Jacobsen,  
436 2010; Xu and Jiang, 2020; H. Zhang et al., 2018). The link with H3K9me has been particularly  
437 difficult to break because of the CMT-SUVH feedback loop (Du et al., 2012; Johnson et al.,  
438 2007; Li et al., 2018; Stoddard et al., 2019).

439         However, we have used *h1c2c3*, *suvh4/5/6* and *polv* mutants to disentangle H3K9me  
440 and non-CG methylation. In all three backgrounds, sRNA biogenesis follows non-CG  
441 methylation instead of H3K9me (Figure 7, 8 and Figure S7). The *h1c2c3* line has been  
442 particularly informative due to the many TEs that maintain H3K9me but lack non-CG  
443 methylation (Figure 7 and Figure S7). H3K9me may be substantially retained in *h1c2c3*  
444 heterochromatin because lack of H1 allows SUVH methyltransferases easier access, so that the  
445 weak affinity of their SRA domains for mCG suffices for effective recruitment (Johnson et al.,  
446 2007; Li et al., 2018; Rajakumara et al., 2011). Whatever the mechanism, the strong linear  
447 association between sRNA biogenesis and non-CG methylation, and the lack of such an  
448 association with H3K9me and mCG (Figure 7 and 8), provide strong support for the hypothesis  
449 that non-CG methylation recruits Pol IV (Figure 9).

450         The linking of Pol IV activity to non-CG methylation instead of H3K9me resolves  
451 several thorny issues. First, the observation that SHH1 – the proposed H3K9me reader – is  
452 preferentially required for RdDM where H3K9me is low (Zhou et al., 2018) can be easily  
453 accommodated if H3K9me is not directly involved in RdDM. Similarly, the finding that severe  
454 loss of H3K9me in *suvh4/5/6* mutants is accompanied by only a modest reduction of sRNA  
455 levels (Zhou et al., 2018) is no longer mysterious. At a more fundamental level, this hypothesis  
456 ties RdDM in a feedback loop with its product and unties it from a histone modification  
457 produced by the distinct CMT-SUVH pathway and depleted from RdDM target sequences.  
458 Breaking RdDM from dependence on any histone modification is also conceptually important  
459 because a core theoretical strength of RdDM is the ability to maintain methylation at much

460 shorter sequences than those where stable histone-based epigenetic inheritance is possible  
461 (Angel et al., 2011; Lövkvist and Howard, 2021; Ramachandran and Henikoff, 2015;  
462 Zilberman and Henikoff, 2004).

463 Long TEs that can be effectively silenced by the histone-dependent CMT-SUVH  
464 pathway tend to be relatively GC-rich because they contain coding sequences (Sequeira-  
465 Mendes et al., 2014; To et al., 2020; Zemach et al., 2013). In contrast, short non-autonomous  
466 TEs and TE remnants tend to lack coding sequences and are thus AT-rich. In this context, the  
467 GC sequence preference of *Arabidopsis* H1 (Choi et al., 2020) may be key. GC bias is far from  
468 a H1 universal, with most animal H1 variants preferring AT-rich DNA (Cao et al., 2013;  
469 Izaurralde et al., 1989; Tomaszewski and Jerzmanowski, 1997). The preferences of plant H1  
470 may have evolved, at least in part, to target it to coding sequences, including those of  
471 autonomous heterochromatic TEs. This would allow H1 to exclude RdDM from such  
472 sequences, which can cover vast tracts of plant genomes (Michael, 2014; Suzuki and Bird,  
473 2008), and focus RdDM on the short TEs it is specialized to silence. The interplay of H1 and  
474 non-CG methylation can thus produce the preferential activity of RdDM at short, AT-rich TEs  
475 observed throughout flowering plants (Gouil and Baulcombe, 2016; Numa et al., 2015; Tan et  
476 al., 2018).

477 **Methods**

478 **Biological materials**

479 *cmt2* and *cmt2cmt3* (Stroud et al., 2014; Zemach et al., 2013) plants were crossed to *hl.1hl.2*  
480 (Zemach et al., 2013) plants to generate *hlcmt2* and *hlcmt2cmt3* plants. To establish the  
481 *hlcmt2shh1* mutant line, we crossed *hl+/-cmt2* plants with *shh1* (SALK\_074540C) plants,  
482 then isolated *hlcmt2shh1* homozygous siblings. *met1*, *hlmet1*, *ddm1*, *hlddm1* plants were  
483 described previously (Choi et al., 2020; Lyons and Zilberman, 2017). *Arabidopsis thaliana*  
484 seedlings were germinated and grown for 4-5 weeks on soil at 20-25°C in growth chambers (16  
485 hr day/8 hr night) for all the experiments performed except for *met1*, *hlmet1*, and  
486 corresponding *wt* seedling sRNA libraries. These seedlings were germinated and grown for  
487 two weeks in half-strength Gamborg's B-5 liquid media (Caisson Labs, cat. No. GBP07) at 22-  
488 25°C under continuous light with shaking at 125 RPM.

489 **Bisulfite Sequencing (BS-seq) library preparation**

490 BS-seq libraries were constructed using genomic DNA (gDNA) extracted from rosette leaves  
491 of 4-5-week-old plants. 500 ng total gDNA was sheared to 100-1000bp using Bioruptor Pico  
492 (Diagenode), then purified with 1.2X volume of SPRI beads (Beckman Coulter, cat. No.  
493 A63881). Fragmented gDNA was ligated to NEBNext Adaptor for Illumina using NEBNext  
494 Ultra II DNA library prep kit for Illumina (New England Biolabs, cat. No. E7645). We  
495 performed bisulfite conversion twice with ligated libraries (QIAGEN, cat. No. 59104) to  
496 prevent incomplete conversion (<99% conversion) of unmethylated cytosines. Converted  
497 libraries were subjected to SPRI bead purification with 0.8X volume of beads. We amplified  
498 bisulfite-converted libraries with NEB next indexing primers (New England Biolabs Inc. cat.  
499 No. E7335S).

500 **Small RNA sequencing library preparation**

501 To isolate small RNA, we extracted total RNA from rosette leaves of 4-5-week-old plants using  
502 Trizol (Invitrogen, cat. No. 15596026) according to manufacturer's manual. To remove DNA  
503 from samples, 5 µg of RNA was treated with DNA-free DNA removal kit (Thermo, cat. No.  
504 AM1907). 1 µg of DNA-free total RNA was subjected to sRNA library construction according  
505 to manufacturer's protocol (Illumina, cat. No. RS-200-0012 and RS-200-0024).

506 **Native Chromatin Immunoprecipitation and sequencing library preparation**

507 MNase digestion of native chromatin was carried out on 0.5g of 4 week old *Arabidopsis* rosette  
508 leaves as described previously (Lyons and Zilberman, 2017). Digestion was stopped with  
509 EGTA and chromatin was rotated at 4°C for 30 minutes. The preparation was then centrifuged  
510 for 10 minutes at 2000 RPM and solubilized chromatin fragments were isolated by aspirating  
511 supernatant immediately. Chromatin was then diluted to 1ml in wash buffer A (50mM Tris-  
512 HCl pH 7.5, 50mM NaCl, 10mM EDTA) and antibody added at 1µl per 0.1 g of total starting  
513 material. Dilute Tween-20 was added to a final concentration of 0.1%, and the mixture was  
514 rotated overnight at 4°C. All buffers were supplemented with PMSF and protease inhibitor  
515 (Roche (Merck), cat. No. 11873580001). A standard immunoprecipitation procedure was used  
516 the following day. Briefly, pre-blocked Protein-A and -G dynabeads (Invitrogen, cat. No.  
517 10001D and 10003D) were incubated with the chromatin preparation for 3 hrs. rotating at 4°C,  
518 and the beads/chromatin mixture was then washed on ice in Tris-EDTA buffer with increasing  
519 concentrations of NaCl, starting at 50mM and ending at 150mM. DNA was eluted from beads  
520 by shaking in 1% SDS and 1% NaHCO<sub>3</sub> for 10 minutes at 55°C, and DNA was purified with  
521 phenol-chloroform extraction. Input and CHIP DNA was converted into sequencing libraries  
522 using Celero DNA reagents (Tecan, cat. No. 3460-24) following manufacturer's instructions.

## 523 Sequencing

524 Sequencing was performed at the John Innes Centre with the NextSeq 500 (Illumina), except  
525 for sRNA libraries from seedlings (*wt*, *met1*, and *h1met1*). These seedling libraries were  
526 sequenced at the Vincent J. Coates Genomic Sequencing Laboratory at the University of  
527 California, Berkeley with the HiSeq 4000 (Illumina).

## 528 Sequence Alignment and data preparation

529 For sRNA-seq libraries, adapter sequences were removed from reads using cutadapt (Martin,  
530 2011). 18-28 bp, 21nt, and 24 nt fragments were isolated using the following cutadapt options:  
531 -m 18 -M 28, -m 21 -M 21, -m 24 -M 24. Reads were mapped with Bowtie (Langmead et al.,  
532 2009) allowing up to 1 mismatch and up to 10 multi-mapped reads. Aligned 21-nt or 24-nt read  
533 counts were normalized by reads per kilobase per million mapped reads (RPKM) of 18-28 bp  
534 fragments. ChIP-seq libraries were mapped with Bowtie (Langmead et al., 2009) allowing up  
535 to 2 mismatches and up to 10 multi-mapped reads. To calculate enrichment, ChIP samples were  
536 divided by input samples and transformed into  $\log_2$  ratio values using deepTools2 bamCompare.  
537 For H3K9me1 and H3K9me2 from WT, *h1*, *ddm1*, *h1ddm1*, *c2c3*, and *h1c2c3*, we used a  
538 random subset of input reads equivalent to 25% of the total uniquely mapped reads of the  
539 corresponding IP for input into bamCompare. For BS-seq libraries, reads were mapped with  
540 the bs-sequel pipeline (<https://zilbermanlab.net/tools/>).

## 541 Description of *Arabidopsis* genome features

542 ‘Transposable elements’ include transposon annotation from (Panda and Slotkin, 2020).  
543 Araport11 TE genes and pseudogenes, and genomic regions with TE-like DNA methylation  
544 (Cheng et al., 2017; Choi et al., 2020; Panda and Slotkin, 2020; Shahzad et al., 2021). We  
545 filtered out elements shorter than 250 bp. Previously, we merged overlapping TE annotations

546 into single TE unit, then defined heterochromatic TEs and euchromatic TEs as transposons  
547 that have more than 0 or less than 0 H3K9me2 ( $\log_2$  ChIP/Input) in *wt* plants (Choi et al., 2020).  
548 Both CMT and DRMs target these merged, long TEs, as the edges of TEs are methylated by  
549 DRMs and the bodies of TEs are methylated by CMTs. Therefore, to isolate TEs with non-CG  
550 methylation dependent on CMTs or DRMs, we did not merge TE annotations here. Among  
551 TEs with mCHH methylation ( $mCHH > 0.05$ ), CMT-dependent TEs were defined as the TEs  
552 that lost mCHH methylation in *cmt2cmt3* plants ( $mCHH < 0.02$  in *cmt2cmt3*). DRM-dependent  
553 TEs were defined as the TEs that lost mCHH methylation in *drm1drm2* plants ( $mCHH < 0.02$   
554 in *drm1drm2*). sRNA cluster annotation is from (Zhou et al., 2018).

#### 555 **Classification of MET1-dependent and -independent CMT TEs**

556 We previously defined MET1-dependent TEs as the TEs that lost H3K9me2 in *met1* plants  
557 (Choi et al., 2020). In this study, to evaluate how DNA methylation affects CLSY3/4-  
558 dependent sRNA expression, we defined MET1-dependent TEs as the TEs that lost mCHH  
559 methylation in *met1* ( $mCHH$  in *wt*  $\geq 0.05$ ,  $mCHH$  in *met1*  $< 0.05$ ), and MET1-independent TEs  
560 as ones that keep mCHH methylation in *met1* ( $mCHH$  in *wt*  $\geq 0.05$ ,  $mCHH$  in *met1*  $\geq 0.05$ ).

#### 561 **Random forest classification and prediction**

562 To measure the importance of each genetic and epigenetic marker to classify DRM and CMT  
563 TEs, we first calculated average enrichment of various histone modifications, histone H1,  
564 average sRNA expression and DNA methylation level at each TE using  
565 `window_by_annotation.pl` Perl script (<https://zilbermanlab.net/tools/>). We also included  
566 density of various cytosine sequence contexts. The importance of each variable was evaluated  
567 using ‘randomForest’ and ‘measure\_importance’ function in RandomForestExplainer R  
568 package (Ishwaran et al., 2010). The importance matrices were visualized by  
569 ‘plot\_multi\_way\_importance’ function of the same package.

570 To evaluate the predictive power of each variable, we randomly divided TEs into training and  
571 validation sets. The random forest classifier was built using TEs in the training set with  
572 indicated variables and the classification of each TE (DRM or CMT). The trained model was  
573 used to predict the category of TEs in the validation set, and the error rate was calculated by  
574 comparing the predicted classification and its actual classification. We used ‘randomforest’  
575 and ‘predict’ function in randomForest R Package.

### 576 **Data visualization**

577 Enrichment scores of various genomic and epigenomic features were generated by  
578 `window_by_annotation.pl` Perl scripts (<https://zilbermanlab.net/tools/>). For scatter plots and  
579 heatscatter plots in Figure 1, the enrichment scores were imported to R (Davey et al., 1997)  
580 and visualized by `ggplot2` R package (Wickham, 2009) or ‘heatscatter’ function in `LSD` R  
581 package (Venables and Ripley, 2002). For scatter plots and heatscatter plots in other figures,  
582 TEs were sorted by their GC content, then average feature enrichments of 100 TEs were  
583 calculated to reduce the variability of data. DNA methylation, H3K9 methylation and sRNA  
584 distribution around TEs were generated with `ends_analysis.pl` and `average_ends_new.pl` Perl  
585 scripts (<https://zilbermanlab.net/tools/>). For sRNA distribution, we removed bins with higher  
586 than 200 rpkm to prevent outliers skewing the average. For proportional Venn diagram, TE ID  
587 lists in each group were uploaded to BioVenn (Hulsen et al., 2008). To visualize the  
588 relationship among genetic, epigenetic features and sRNA expression in *c2c3* and *h1c2c3*  
589 plants, principal component analysis was applied to arrays of features using Gene Cluster 3.0  
590 (de Hoon et al., 2004; Figure 6C). For Pearson’s correlation coefficient plots, the DNA  
591 methylation, H3K9 methylation, and sRNA expression level matrices were imported to R and  
592 visualized using `corrplot` R package (Friendly, 2002; Murdoch and Chow, 1996; Figure 7 and  
593 8). Screenshots of *Arabidopsis* genomic loci were taken in IGV (Robinson et al., 2011;

594 Thorvaldsdottir et al., 2013). Treeview was used to generate heatmaps (de Hoon et al., 2004).  
595 For sRNA plots around nucleosomes (Figure 2), previously published nucleosome dyad  
596 coordinates were used (Lyons and Zilberman 2017) as anchors around which 10-bp bins of 24-  
597 nt sRNA were averaged and plotted. Autocorrelation estimates were generated on these  
598 averages using the built-in R 'acf' function.

### 599 **Use of Previously Published Data**

600 DNA methylation data of *c2c3* and *ddcc* plants (Stroud et al., 2014), DNA methylation and  
601 sRNA data of *clsy1/2*, *clsy3/4*, and *shh1* plants (Zhou et al., 2018), DNA methylation and  
602 H3K9me data of *met1* and *h1met1* plants (Choi et al., 2020), DNA methylation, H3K9me2,  
603 and sRNA expression data of *suvh4/5/6* plants (Papareddy et al., 2020; Stroud et al., 2014), and  
604 DNA methylation and sRNA data of *polv* plants (Johnson et al., 2014; Zhong et al., 2012) were  
605 obtained through GEO (GEO accessions: GSE51304, GSE99694, GSE122394, GSE152971,  
606 GSE52041 and GSE39247).

607

### 608 **Data Availability**

609 The accession number for the NGS data reported in this paper is GEO: GSEXXXXXX.



610 **References**

- 611 Allshire RC, Madhani HD. 2018. Ten principles of heterochromatin formation and function.  
612 *Nat Rev Mol Cell Biol* **19**:229–244. doi:10.1038/nrm.2017.119
- 613 Angel A, Song J, Dean C, Howard M. 2011. A Polycomb-based switch underlying  
614 quantitative epigenetic memory. *Nature* **476**:105–108. doi:10.1038/nature10241
- 615 Berry S, Dean C. 2015. Environmental perception and epigenetic memory: Mechanistic  
616 insight through FLC. *Plant J* **83**:133–148. doi:10.1111/tpj.12869
- 617 Blevins T, Podicheti R, Mishra V, Marasco M, Wang J, Rusch D, Tang H, Pikaard CS. 2015.  
618 Identification of Pol IV and RDR2-dependent precursors of 24 nt siRNAs guiding de  
619 novo DNA methylation in Arabidopsis. *Elife* **4**:e09591. doi:10.7554/eLife.09591
- 620 Bourguet P, Picard CL, Yelagandula R, Pélissier T, Lorković ZJ, Feng S, Pouch-Pélissier M-  
621 N, Schmücker A, Jacobsen SE, Berger F, Mathieu O. 2021. The histone variant H2A.W  
622 and linker histone H1 co-regulate heterochromatin accessibility and DNA methylation.  
623 *Nat Commun* **12**:2683. doi:10.1038/s41467-021-22993-5
- 624 Bourque G, Burns KH, Gehring M, Gorbunova V, Seluanov A, Hammell M, Imbeault M,  
625 Izsvák Z, Levin HL, Macfarlan TS, Mager DL, Feschotte C. 2018. Ten things you  
626 should know about transposable elements. *Genome Biol* **19**:199. doi:10.1186/s13059-  
627 018-1577-z
- 628 Breiman L. 2001. Random forests. *Mach Learn* **45**:5–32. doi:10.1023/A:1010933404324
- 629 Cao K, Lailier N, Zhang Y, Kumar A, Uppal K, Liu Z, Lee EK, Wu H, Medrzycki M, Pan C,  
630 Ho P-Y, Cooper GP, Dong X, Bock C, Bouhassira EE, Fan Y. 2013. High-resolution  
631 mapping of H1 linker histone variants in embryonic stem cells. *PLoS Genet* **9**:e1003417.  
632 doi:10.1371/journal.pgen.1003417
- 633 Cheng C-Y, Krishnakumar V, Chan AP, Thibaud-Nissen F, Schobel S, Town CD. 2017.  
634 Araport11: a complete reannotation of the Arabidopsis thaliana reference genome. *Plant*

- 635 *J* **89**:789–804. doi:10.1111/tpj.13415
- 636 Choi J, Lyons DB, Kim MY, Moore JD, Zilberman D. 2020. DNA methylation and histone  
637 H1 jointly repress transposable elements and aberrant intragenic transcripts. *Mol Cell*  
638 **77**:310-323.e7. doi:10.1016/j.molcel.2019.10.011
- 639 Cokus SJ, Feng S, Zhang X, Chen Z, Merriman B, Haudenschild CD, Pradhan S, Nelson SF,  
640 Pellegrini M, Jacobsen SE. 2008. Shotgun bisulphite sequencing of the Arabidopsis  
641 genome reveals DNA methylation patterning. *Nature* **452**:215–219.  
642 doi:10.1038/nature06745
- 643 Davey C, Pennings S, Allan J. 1997. CpG methylation remodels chromatin structure in vitro.  
644 *J Mol Biol* **267**:276–288. doi:10.1006/JMBI.1997.0899
- 645 de Hoon MJL, Imoto S, Nolan J, Miyano S. 2004. Open source clustering software.  
646 *Bioinformatics* **20**:1453–1454. doi:10.1093/bioinformatics/bth078
- 647 Deleris A, Stroud H, Bernatavichute Y, Johnson E, Klein G, Schubert D, Jacobsen SE. 2012.  
648 Loss of the DNA methyltransferase MET1 induces H3K9 hypermethylation at PcG  
649 target genes and redistribution of H3K27 trimethylation to transposons in Arabidopsis  
650 thaliana. *PLoS Genet* **8**:e1003062. doi:10.1371/journal.pgen.1003062
- 651 Du J, Johnson LM, Groth M, Feng S, Hale CJ, Li S, Vashisht AA, Gallego-Bartolome J,  
652 Wohlschlegel JA, Patel DJ, Jacobsen SE. 2014. Mechanism of DNA methylation-  
653 directed histone methylation by KRYPTONITE. *Mol Cell* **55**:495–504.  
654 doi:10.1016/j.molcel.2014.06.009
- 655 Du J, Zhong X, Bernatavichute Y V., Stroud H, Feng S, Caro E, Vashisht AA, Terragni J,  
656 Chin HG, Tu A, Hetzel J, Wohlschlegel JA, Pradhan S, Patel DJ, Jacobsen SE. 2012.  
657 Dual binding of chromomethylase domains to H3K9me2-containing nucleosomes  
658 directs DNA methylation in plants. *Cell* **151**:167–180. doi:10.1016/j.cell.2012.07.034
- 659 Erdmann RM, Picard CL. 2020. RNA-directed DNA methylation, *PLoS Genet.* **16**,

- 660 e1009034. doi:10.1371/journal.pgen.1009034
- 661 Feng S, Cokus SJ, Zhang X, Chen P-Y, Bostick M, Goll MG, Hetzel J, Jain J, Strauss SH,  
662 Halpern ME, Ukomadu C, Sadler KC, Pradhan S, Pellegrini M, Jacobsen SE. 2010.  
663 Conservation and divergence of methylation patterning in plants and animals. *Proc Natl*  
664 *Acad Sci USA* **107**:8689–8694. doi:10.1073/pnas.1002720107
- 665 Feng W, Michaels SD. 2015. Accessing the inaccessible: The organization, transcription,  
666 replication, and repair of heterochromatin in plants. *Annu Rev Genet* **49**:439–459.  
667 doi:10.1146/annurev-genet-112414-055048
- 668 Friendly M. 2002. Corrgrams: Exploratory displays for correlation matrices. *Am Stat* **56**:316–  
669 324. doi:10.1198/000313002533
- 670 Gouil Q, Baulcombe DC. 2016. DNA methylation signatures of the plant  
671 chromomethyltransferases. *PLoS Genet* **12**:e1006526.  
672 doi:10.1371/journal.pgen.1006526
- 673 Greenberg MVC, Deleris A, Hale CJ, Liu A, Feng S, Jacobsen SE. 2013. Interplay between  
674 active chromatin marks and RNA-directed DNA methylation in *Arabidopsis thaliana*.  
675 *PLoS Genet* **9**:e1003946. doi:10.1371/journal.pgen.1003946
- 676 Herr AJ, Jensen MB, Dalmay T, Baulcombe DC. 2005. RNA polymerase IV directs silencing  
677 of endogenous DNA. *Science* **308**:118–120. doi:10.1126/science.1106910
- 678 Hulsen T, de Vlieg J, Alkema W. 2008. BioVenn – a web application for the comparison and  
679 visualization of biological lists using area-proportional Venn diagrams. *BMC Genomics*  
680 **9**:488. doi:10.1186/1471-2164-9-488
- 681 Ishwaran H, Kogalur UB, Gorodeski EZ, Minn AJ, Lauer MS. 2010. High-dimensional  
682 variable selection for survival data. *J Am Stat Assoc* **105**:205–217.  
683 doi:10.1198/jasa.2009.tm08622
- 684 Ito T, Tarutani Y, To TK, Kassam M, Duvernois-Berthet E, Cortijo S, Takashima K, Saze H,

- 685 Toyoda A, Fujiyama A, Colot V, Kakutani T. 2015. Genome-wide negative feedback  
686 drives transgenerational DNA methylation dynamics in *Arabidopsis*. *PLoS Genet*  
687 **11**:e1005154. doi:10.1371/journal.pgen.1005154
- 688 Izaurrealde E, Käs E, Laemmli UK. 1989. Highly preferential nucleation of histone H1  
689 assembly on scaffold-associated regions. *J Mol Biol* **210**:573–585.  
690 doi:[https://doi.org/10.1016/0022-2836\(89\)90133-2](https://doi.org/10.1016/0022-2836(89)90133-2)
- 691 Johnson LM, Bostick M, Zhang X, Kraft E, Henderson I, Callis J, Jacobsen SE. 2007. The  
692 SRA methyl-cytosine-binding domain links DNA and histone methylation. *Curr Biol*  
693 **17**:379–384. doi:<https://doi.org/10.1016/j.cub.2007.01.009>
- 694 Johnson LM, Du J, Hale CJ, Bischof S, Feng S, Chodavarapu RK, Zhong X, Marson G,  
695 Pellegrini M, Segal DJ, Patel DJ, Jacobsen SE. 2014. SRA- and SET-domain-containing  
696 proteins link RNA polymerase V occupancy to DNA methylation. *Nature* **507**:124–128.  
697 doi:10.1038/nature12931
- 698 Kim MY, Zilberman D. 2014. DNA methylation as a system of plant genomic immunity.  
699 *Trends Plant Sci* **19**:320–326. doi:10.1016/j.tplants.2014.01.014
- 700 Langmead B, Trapnell C, Pop M, Salzberg SL. 2009. Ultrafast and memory-efficient  
701 alignment of short DNA sequences to the human genome. *Genome Biol* **10**:R25.  
702 doi:10.1186/gb-2009-10-3-r25
- 703 Law JA, Du J, Hale CJ, Feng S, Krajewski K, Palanca AMS, Strahl BD, Patel DJ, Jacobsen  
704 SE. 2013. Polymerase IV occupancy at RNA-directed DNA methylation sites requires  
705 SHH1. *Nature* **498**:385–389. doi:10.1038/nature12178
- 706 Law JA, Jacobsen SE. 2010. Establishing, maintaining and modifying DNA methylation  
707 patterns in plants and animals. *Nat Rev Genet* **11**:204–220. doi:10.1038/nrg2719
- 708 Li J, Yang D-L, Huang H, Zhang G, He L, Pang J, Lozano-Durán R, Lang Z, Zhu J-K. 2020.  
709 Epigenetic memory marks determine epiallele stability at loci targeted by de novo DNA

- 710 methylation. *Nat Plants* **6**:661–674. doi:10.1038/s41477-020-0671-x
- 711 Li X, Harris CJ, Zhong Z, Chen W, Liu R, Jia B, Wang Z, Li S, Jacobsen SE, Du J. 2018.
- 712 Mechanistic insights into plant SUVH family H3K9 methyltransferases and their
- 713 binding to context-biased non-CG DNA methylation. *Proc Natl Acad Sci USA*
- 714 **115**:E8793–E8802. doi:10.1073/pnas.1809841115
- 715 Lippman Z, Gendrel A-V, Black M, Vaughn MW, Dedhia N, Richard McCombie W, Lavine
- 716 K, Mittal V, May B, Kasschau KD, Carrington JC, Doerge RW, Colot V, Martienssen
- 717 R. 2004. Role of transposable elements in heterochromatin and epigenetic control.
- 718 *Nature* **430**:471–476. doi:10.1038/nature02651
- 719 Lister R, O'Malley RC, Tonti-Filippini J, Gregory BD, Berry CC, Millar AH, Ecker JR.
- 720 2008. Highly integrated single-base resolution maps of the epigenome in Arabidopsis.
- 721 *Cell* **133**:523–536. doi:10.1016/J.CELL.2008.03.029
- 722 Liu Z-W, Shao C-R, Zhang C-J, Zhou J-X, Zhang S-W, Li L, Chen S, Huang H-W, Cai T, He
- 723 X-J. 2014. The SET domain proteins SUVH2 and SUVH9 are required for Pol V
- 724 occupancy at RNA-directed DNA methylation loci. *PLoS Genet* **10**:e1003948.
- 725 doi:10.1371/journal.pgen.1003948
- 726 Lövkvist C, Howard M. 2021. Using computational modelling to reveal mechanisms of
- 727 epigenetic Polycomb control. *Biochem Soc Trans* **49**:71–77. doi:10.1042/BST20190955
- 728 Lyons DB, Zilberman D. 2017. DDM1 and Lsh remodelers allow methylation of DNA
- 729 wrapped in nucleosomes. *Elife* **6**:e30674. doi:10.7554/eLife.30674
- 730 Martin M. 2011. Cutadapt removes adapter sequences from high-throughput sequencing
- 731 reads. *EMBnet.journal* **17**:10–12. doi:10.14806/ej.17.1.200
- 732 Matzke MA, Mosher RA. 2014. RNA-directed DNA methylation: an epigenetic pathway of
- 733 increasing complexity. *Nat Rev Genet* **15**:394–408. doi:10.1038/nrg3683
- 734 Michael TP. 2014. Plant genome size variation: bloating and purging DNA. *Brief Funct*

- 735        *Genomics* **13**:308–317. doi:10.1093/bfgp/elu005
- 736    Miura A, Nakamura M, Inagaki S, Kobayashi A, Saze H, Kakutani T. 2009. An Arabidopsis  
737        jmjC domain protein protects transcribed genes from DNA methylation at CHG sites.  
738        *EMBO J* **28**:1078–1086. doi:10.1038/emboj.2009.59
- 739    Murdoch DJ, Chow ED. 1996. A Graphical Display of Large Correlation Matrices. *Am Stat*  
740        **50**:178–180. doi:10.1080/00031305.1996.10474371
- 741    Niederhuth CE, Bewick AJ, Ji L, Alabady MS, Kim K Do, Li Q, Rohr NA, Rambani A,  
742        Burke JM, Udall JA, Egesi C, Schmutz J, Grimwood J, Jackson SA, Springer NM,  
743        Schmitz RJ. 2016. Widespread natural variation of DNA methylation within  
744        angiosperms. *Genome Biol* **17**:194. doi:10.1186/s13059-016-1059-0
- 745    Numa H, Yamaguchi K, Shigenobu S, Habu Y. 2015. Gene body CG and CHG methylation  
746        and suppression of centromeric CHH methylation are mediated by DECREASE IN  
747        DNA METHYLATION1 in rice. *Mol Plant* **8**:1560–1562.  
748        doi:10.1016/j.molp.2015.08.002
- 749    Osakabe A, Jamge B, Axelsson E, Montgomery SA, Akimcheva S, Kuehn AL, Pisupati R,  
750        Lorković ZJ, Yelagandula R, Kakutani T, Berger F. 2021. The chromatin remodeler  
751        DDM1 prevents transposon mobility through deposition of histone variant H2A.W. *Nat*  
752        *Cell Biol* **23**:391–400. doi:10.1038/s41556-021-00658-1
- 753    Panda K, Ji L, Neumann DA, Daron J, Schmitz RJ, Slotkin RK. 2016. Full-length  
754        autonomous transposable elements are preferentially targeted by expression-dependent  
755        forms of RNA-directed DNA methylation. *Genome Biol* **17**:170. doi:10.1186/s13059-  
756        016-1032-y
- 757    Panda K, Slotkin RK. 2020. Long-read cDNA sequencing enables a “gene-like” transcript  
758        annotation of transposable elements. *Plant Cell* **32**:2687–2698.  
759        doi:10.1105/tpc.20.00115

- 760 Papareddy RK, Páldi K, Paulraj S, Kao P, Lutzmayer S, Nodine MD. 2020. Chromatin  
761 regulates expression of small RNAs to help maintain transposon methylome  
762 homeostasis in Arabidopsis. *Genome Biol* **21**:251. doi:10.1186/s13059-020-02163-4
- 763 Rajakumara E, Law JA, Simanshu DK, Voigt P, Johnson LM, Reinberg D, Patel DJ,  
764 Jacobsen SE. 2011. A dual flip-out mechanism for 5mC recognition by the Arabidopsis  
765 SUVH5 SRA domain and its impact on DNA methylation and H3K9 dimethylation in  
766 vivo. *Genes Dev* **25**:137–152. doi:10.1101/gad.1980311
- 767 Raju SKK, Ritter EJ, Niederhuth CE. 2019. Establishment, maintenance, and biological roles  
768 of non-CG methylation in plants. *Essays Biochem* **63**:743–755.  
769 doi:10.1042/EBC20190032
- 770 Ramachandran S, Henikoff S. 2015. Replicating nucleosomes. *Sci Adv* **1**:e1500587.  
771 doi:10.1126/sciadv.1500587
- 772 Ritter EJ, Niederhuth CE. 2021. Intertwined evolution of plant epigenomes and genomes.  
773 *Curr Opin Plant Biol* **61**:101990. doi:https://doi.org/10.1016/j.pbi.2020.101990
- 774 Robinson JT, Thorvaldsdóttir H, Winckler W, Guttman M, Lander ES, Getz G, Mesirov JP.  
775 2011. Integrative genomics viewer. *Nat Biotechnol* **29**:24–26. doi:10.1038/nbt.1754
- 776 Rougée M, Quadrana L, Zervudacki J, Hure V, Colot V, Navarro L, Deleris A. 2020.  
777 Polycomb mutant partially suppresses DNA hypomethylation-associated phenotypes in  
778 Arabidopsis. *Life Sci Alliance* **4**:e202000848. doi:10.26508/lsa.202000848
- 779 Rutowicz K, Puzio M, Halibart-Puzio J, Lirski M, Kotliński M, Kroteń MA, Knizewski L,  
780 Lange B, Muszewska A, Śniegowska-Świerk K, Kościelniak J, Iwanicka-Nowicka R,  
781 Buza K, Janowiak F, Żmuda K, Jõesaar I, Laskowska-Kaszub K, Fogtman A, Kollist H,  
782 Zielenkiewicz P, Tiuryn J, Siedlecki P, Swiezewski S, Ginalski K, Koblowska M,  
783 Archacki R, Wilczynski B, Rapacz M, Jerzmanowski A. 2015. A specialized histone H1  
784 variant is required for adaptive responses to complex abiotic stress and related DNA



- 785 methylation in Arabidopsis. *Plant Physiol* **169**:2080–2101. doi:10.1104/pp.15.00493
- 786 Sequeira-Mendes J, Aragüez I, Peiró R, Mendez-Giraldez R, Zhang X, Jacobsen SE, Bastolla  
787 U, Gutierrez C. 2014. The functional topography of the Arabidopsis genome is  
788 organized in a reduced number of linear motifs of chromatin states. *Plant Cell* **26**:2351–  
789 2366. doi:10.1105/tpc.114.124578
- 790 Shahzad Z, Moore JD, Zilberman D. 2021. Gene body methylation mediates epigenetic  
791 inheritance of plant traits. *bioRxiv* 2021.03.15.435374. doi:10.1101/2021.03.15.435374
- 792 Sigman MJ, Slotkin RK. 2016. The first rule of plant transposable element silencing:  
793 Location, location, location. *Plant Cell* **28**:304–313. doi:10.1105/tpc.15.00869
- 794 Smith LM, Pontes O, Searle I, Yelina N, Yousafzai FK, Herr AJ, Pikaard CS, Baulcombe  
795 DC. 2007. An SNF2 protein associated with nuclear RNA silencing and the spread of a  
796 silencing signal between cells in Arabidopsis. *Plant Cell* **19**:1507–1521.  
797 doi:10.1105/tpc.107.051540
- 798 Soppe WJJ, Jasencakova Z, Houben A, Kakutani T, Meister A, Huang MS, Jacobsen SE,  
799 Schubert I, Fransz PF. 2002. DNA methylation controls histone H3 lysine 9 methylation  
800 and heterochromatin assembly in Arabidopsis. *EMBO J* **21**:6549–6559.  
801 doi:10.1093/emboj/cdf657
- 802 Stoddard CI, Feng S, Campbell MG, Liu W, Wang H, Zhong X, Bernatavichute Y, Cheng Y,  
803 Jacobsen SE, Narlikar GJ. 2019. A nucleosome bridging mechanism for activation of a  
804 maintenance DNA methyltransferase. *Mol Cell* **73**:73-83.e6.  
805 doi:10.1016/J.MOLCEL.2018.10.006
- 806 Stroud H, Do T, Du J, Zhong X, Feng S, Johnson L, Patel DJ, Jacobsen SE. 2014. Non-CG  
807 methylation patterns shape the epigenetic landscape in Arabidopsis. *Nat Struct Mol Biol*  
808 **21**:64–72. doi:10.1038/nsmb.2735
- 809 Suzuki MM, Bird A. 2008. DNA methylation landscapes: Provocative insights from

- 810 epigenomics. *Nat Rev Genet* **9**:465–476. doi:10.1038/nrg2341
- 811 Tan F, Lu Y, Jiang W, Wu T, Zhang R, Zhao Y, Zhou D-X. 2018. DDM1 represses  
812 noncoding RNA expression and RNA-directed DNA methylation in heterochromatin.  
813 *Plant Physiol* **177**:1187–1197. doi:10.1104/pp.18.00352
- 814 Teixeira FK, Heredia F, Sarazin A, Roudier F, Boccara M, Ciaudo C, Cruaud C, Poulain J,  
815 Berdasco M, Fraga MF, Voinnet O, Wincker P, Esteller M, Colot V. 2009. A role for  
816 RNAi in the selective correction of DNA methylation defects. *Science* **323**:1600–1604.  
817 doi:10.1126/science.1165313
- 818 Thorvaldsdottir H, Robinson JT, Mesirov JP. 2013. Integrative Genomics Viewer (IGV):  
819 High-performance genomics data visualization and exploration. *Brief Bioinform* **14**:178–  
820 192. doi:10.1093/bib/bbs017
- 821 To TK, Nishizawa Y, Inagaki S, Tarutani Y, Tominaga S, Toyoda A, Fujiyama A, Berger F,  
822 Kakutani T. 2020. RNA interference-independent reprogramming of DNA methylation  
823 in Arabidopsis. *Nat Plants* **6**:1455–1467. doi:10.1038/s41477-020-00810-z
- 824 Tomaszewski R, Jerzmanowski A. 1997. The AT-rich flanks of the oocyte-type 5S RNA  
825 gene of *Xenopus laevis* act as a strong local signal for histone H1-mediated chromatin  
826 reorganization in vitro. *Nucleic Acids Res* **25**:458–465. doi:10.1093/nar/25.3.458
- 827 Venables WN, Ripley BD. 2002. Modern applied statistics with S. Springer.
- 828 Wendte JM, Pikaard CS. 2017. The RNAs of RNA-directed DNA methylation. *Biochim*  
829 *Biophys Acta - Gene Regul Mech* **1860**:140–148.  
830 doi:<https://doi.org/10.1016/j.bbagr.2016.08.004>
- 831 Wickham H. 2009. Ggplot2 : Elegant graphics for data analysis. New York: Springer-Verlag.
- 832 Wongpalee SP, Liu S, Gallego-Bartolomé J, Leitner A, Aebersold R, Liu W, Yen L, Nohales  
833 MA, Kuo PH, Vashisht AA, Wohlschlegel JA, Feng S, Kay SA, Zhou ZH, Jacobsen SE.  
834 2019. CryoEM structures of Arabidopsis DDR complexes involved in RNA-directed

- 835 DNA methylation. *Nat Commun* **10**:3916. doi:10.1038/s41467-019-11759-9
- 836 Xu L, Jiang H. 2020. Writing and reading histone H3 lysine 9 methylation in Arabidopsis.  
837 *Front. Plant Sci.* **11**:452. doi: 10.3389/fpls.2020.00452
- 838 Yaari R, Noy-Malka C, Wiedemann G, Gershovitz NA, Reski R, Katz A, Ohad N. 2015.  
839 DNA METHYLTRANSFERASE 1 is involved in mCG and mCCG DNA methylation  
840 and is essential for sporophyte development in *Physcomitrella patens*. *Plant Mol Biol*  
841 **88**:387–400. doi: 10.1007/s11103-015-0328-8
- 842 Yang D-L, Zhang G, Wang L, Li J, Xu D, Di C, Tang K, Yang L, Zeng L, Miki D, Duan C-  
843 G, Zhang H, Zhu J-K. 2018. Four putative SWI2/SNF2 chromatin remodelers have dual  
844 roles in regulating DNA methylation in Arabidopsis. *Cell Discov* **4**:55.  
845 doi:10.1038/s41421-018-0056-8
- 846 Zabet NR, Catoni M, Prischi F, Paszkowski J. 2017. Cytosine methylation at CpCpG sites  
847 triggers accumulation of non-CpG methylation in gene bodies. *Nucleic Acids Res*  
848 **45**:3777–3784. doi:10.1093/nar/gkw1330
- 849 Zemach A, Kim MY, Hsieh P-H, Coleman-Derr D, Eshed-Williams L, Thao K, Harmer SL,  
850 Zilberman D. 2013. The Arabidopsis nucleosome remodeler DDM1 allows DNA  
851 methyltransferases to access H1-containing heterochromatin. *Cell* **153**:193–205.  
852 doi:10.1016/j.cell.2013.02.033
- 853 Zemach A, McDaniel IE, Silva P, Zilberman D. 2010. Genome-wide evolutionary analysis of  
854 eukaryotic DNA methylation. *Science* **328**:916–919. doi:10.1126/science.1159151
- 855 Zhai J, Bischof S, Wang H, Feng S, Lee T-F, Teng C, Chen X, Park SY, Liu L, Gallego-  
856 Bartolome J, Liu W, Henderson IR, Meyers BC, Ausin I, Jacobsen SE. 2015. A one  
857 precursor one siRNA model for pol IV-dependent siRNA biogenesis. *Cell* **163**:445–55.  
858 doi:10.1016/j.cell.2015.09.032
- 859 Zhang H, Lang Z, Zhu J-K. 2018. Dynamics and function of DNA methylation in plants. *Nat*

- 860 *Rev Mol Cell Biol* **19**:489–506. doi:10.1038/s41580-018-0016-z
- 861 Zhang H, Ma ZY, Zeng L, Tanaka K, Zhang CJ, Ma J, Bai G, Wang P, Zhang SW, Liu ZW,  
862 Cai T, Tang K, Liu R, Shi X, He XJ, Zhu JK. 2013. DTF1 is a core component of RNA-  
863 directed DNA methylation and may assist in the recruitment of Pol IV. *Proc Natl Acad*  
864 *Sci USA* **110**:8290–8295. doi:10.1073/pnas.1300585110
- 865 Zhang Y, Harris CJ, Liu Q, Liu W, Ausin I, Long Y, Xiao L, Feng L, Chen Xu, Xie Y, Chen  
866 Xinyuan, Zhan L, Feng S, Li JJ, Wang H, Zhai J, Jacobsen SE. 2018. Large-scale  
867 comparative epigenomics reveals hierarchical regulation of non-CG methylation in  
868 Arabidopsis. *Proc Natl Acad Sci USA* E1069–E1074. doi:10.1073/pnas.1716300115
- 869 Zhong X, Hale CJ, Law JA, Johnson LM, Feng S, Tu A, Jacobsen SE. 2012. DDR complex  
870 facilitates global association of RNA polymerase V to promoters and evolutionarily  
871 young transposons. *Nat Struct Mol Biol* **19**:870–875. doi:10.1038/nsmb.2354
- 872 Zhou M, Palanca AMS, Law JA. 2018. Locus-specific control of the de novo DNA  
873 methylation pathway in Arabidopsis by the CLASSY family. *Nat Genet* **50**:865–873.  
874 doi:10.1038/s41588-018-0115-y
- 875 Zilberman D, Henikoff S. 2004. Silencing of transposons in plant genomes: Kick them when  
876 they're down. *Genome Biol* **5**:249. doi:10.1186/gb-2004-5-12-249
